# Supplementary material
Source: PubMed Central journal article supplement (PMC3216237)
Supplement: NIHMS329855-supplement-1_si_001.pdf [file NIHMS329855-supplement-1_si_001.pdf]

GAS CHROMATOGRAPHIC ANALYSIS WITH  
CHIRAL CYCLODEXTRIN PHASES REVEALS THE  
ENANTIOSELECTIVE FORMATION OF  
HYDROXYLATED POLYCHLORINATED  
BIPHENYLS BY RAT LIVER MICROSOMES

SUPPORTING INFORMATION

*Izabela Kania-Korwel<sup>§</sup>, Michael W. Duffel<sup>‡</sup>, Hans-Joachim Lehmler<sup>§\*</sup>*

<sup>§</sup> Department of Occupational and Environmental Health, College of Public Health, University of Iowa,  
Iowa City, Iowa 52242

<sup>‡</sup> Department of Pharmaceutical Sciences and Experimental Therapeutics, College of Pharmacy,  
University of Iowa, Iowa City, Iowa 52242

**RECEIVED DATE**

Corresponding Author: Dr. Hans-Joachim Lehmler, The University of Iowa,  
Department of Occupational and Environmental Health,  
University of Iowa Research Park, #221 IREH, Iowa City, IA 52242-5000  
Phone: (319) 335-4211, Fax: (319) 335-4290, e-mail: [hans-joachim-lehmler@uiowa.edu](mailto:hans-joachim-lehmler@uiowa.edu)

## INDEX:

|                                                                                                                                                                                                                  |       |
|------------------------------------------------------------------------------------------------------------------------------------------------------------------------------------------------------------------|-------|
| Animal treatment and preparation of microsomes                                                                                                                                                                   | 3     |
| Cytochrome P450 activities                                                                                                                                                                                       | 3     |
| <b>Table S1.</b> Structure, IUPAC name, abbreviation and resolution of methoxylated polychlorinated biphenyls on different enantioselective columns and using different temperature programs.                    | 4-10  |
| <b>Table S2.</b> Summary of the best resolution achieved in the isothermal analysis for the atropisomers of the MeO-PCBs.                                                                                        | 11    |
| <b>Table S3.</b> List and characteristics of enantioselective columns used for the separation of methoxylated PCB derivatives.                                                                                   | 12    |
| <b>Table S4.</b> Amounts and enantiomeric fractions of methoxylated PCBs from microsomal incubations of PCBs 91, 95, 132 and 149 determined on six enantioselective columns during isothermal analysis at 160°C. | 13    |
| <b>Figure S1.</b> The resolution on different enantioselective columns plotted against temperature of the isothermal analysis in the range from 140°C to 180°C for 5-91 and 5-132.                               | 14-15 |
| <b>Figure S2A.</b> Resolution of all studied methoxylated compounds on the ChiralDex B-DM column using temperature programmed analysis.                                                                          | 16-18 |
| <b>Figure S2B.</b> Resolution of 5-91 on all enantioselective columns using temperature programmed analysis.                                                                                                     | 19-20 |
| <b>Figure S3.</b> The isothermal resolution of 5-91 (1) and 5'-132 (2) on different columns                                                                                                                      | 21    |
| <b>Figure S4.</b> Microsomal metabolism of PCB 91 by liver microsomes.                                                                                                                                           | 22-25 |
| <b>Figure S5.</b> Microsomal metabolism of PCB 95 by liver microsomes.                                                                                                                                           | 26-29 |
| <b>Figure S6.</b> Microsomal metabolism of PCB 132 by liver microsomes.                                                                                                                                          | 30-34 |
| <b>Figure S7.</b> Microsomal metabolism of PCB 149 by liver microsomes.                                                                                                                                          | 35-38 |
| <b>Figure S8.</b> Enantiomeric enrichment of 5-91 in an incubation of PCB 91 with liver microsomes analyzed on different enantioselective columns compared to the corresponding metabolite standards.            | 39-41 |
| <b>Figure S9.</b> Enantiomeric enrichment of 5-95 and X-95 in an incubation of PCB 95 with liver microsomes analyzed on different enantioselective columns compared to the corresponding metabolite standards.   | 42-44 |
| <b>Figure S10.</b> Enantiomeric enrichment of 5'-132 in an incubation of PCB 132 with liver microsomes analyzed on different enantioselective columns compared to the corresponding metabolite standards.        | 45-47 |
| <b>Figure S11.</b> Enantiomeric enrichment of 5-149 in an incubation of PCB 149 with liver microsomes analyzed on different enantioselective columns compared to the corresponding metabolite standards.         | 48-50 |
| References                                                                                                                                                                                                       | 51    |

## **Animal treatment and preparation of microsomes**

Experiments involving animals were approved by the Institutional Animal Care and Use Committee at the University of Iowa. Six Sprague-Dawley rats were purchased from Harlan, Inc. (Indianapolis, IN, USA) and allowed to acclimatize for one week. The animals received intraperitoneal injections of phenobarbital (3 doses on consecutive days, 102 mg/kg b.w./day in saline). Rats were euthanized by CO<sub>2</sub> asphyxiation followed by cervical dislocation 24 h after the last phenobarbital treatment. Livers were excised *en bloc* and immediately placed in ice-cold 0.05 M Tris-HCl buffer (pH 7.5) containing 0.15 M KCl. The liver microsomes were isolated by differential centrifugation as described previously (1, 2). In short, liver homogenates were prepared from individual livers from each treatment groups and centrifuged at 9,000 g for 20 min at 5°C. The supernatant was centrifuged at 100,000 g for 60 min at 5°C to separate cytosol from the pellet. The pellet was subsequently re-suspended in EDTA-KCl buffer and centrifuged again at 100,000 g for 60 min at 5°C. The pooled microsomal pellet from this separation was re-suspended in 0.25 M sucrose and ~1 mL aliquots were stored at -80°C.

## **Cytochrome P450 enzyme activities**

The protein levels in microsomes were measured using Lowry method (3), using bovine serum albumin as standard. The activity of cytochrome P450 isoforms in the liver microsomes were obtained using 7-ethoxyresorufin-O-deethylase (EROD), 7-benzyloxyresorufin-O-debenzylase (BROD) and 7-benzyloxyquinoline debenzylolation (BQ) activity using established methods (4, 5). The activities were 1300, 13100 and 15800 pmol/min/mg protein for EROD, BROD and BQ respectively.

**Table S1.A.** Structure, IUPAC name, abbreviation and resolution of methoxylated polychlorinated biphenyls on different enantioselective columns and using different temperature programs<sup>1,2</sup>.

|           |                        |                                                                         |                 |                 |                |                |
|-----------|------------------------|-------------------------------------------------------------------------|-----------------|-----------------|----------------|----------------|
| <b>A.</b> |                        | 3-Methoxy-2,2',4,6-tetrachlorobiphenyl<br><b>(3-50)<sup>3</sup></b>     |                 |                 |                |                |
| Column    | Programmed temperature | Isothermal                                                              |                 |                 |                |                |
|           |                        | 140°C                                                                   | 150°C           | 160°C           | 170°C          | 180°C          |
| 20B       | nr (95.5)              |                                                                         |                 |                 |                |                |
| BGB       | nr (89.3)              |                                                                         |                 |                 |                |                |
| BDM       | nr (75.4)              |                                                                         |                 |                 |                |                |
| BPM       | nr (70.3)              |                                                                         |                 |                 |                |                |
| CB        | nr (86.0)              |                                                                         |                 |                 |                |                |
| CD        | nr (69.9)              |                                                                         |                 |                 |                |                |
| GTA       | nr (77.1)              |                                                                         |                 |                 |                |                |
| <b>B.</b> |                        | 3-Methoxy-2,2',3',4,6-pentachlorobiphenyl<br><b>(3-98)<sup>3</sup></b>  |                 |                 |                |                |
| Column    | Programmed temperature | Isothermal                                                              |                 |                 |                |                |
|           |                        | 140°C                                                                   | 150°C           | 160°C           | 170°C          | 180°C          |
| 20B       | nr (112.5)             |                                                                         |                 |                 |                |                |
| BGB       | nr (106.3)             |                                                                         |                 |                 |                |                |
| BDM       | 0.55 (92.0)            | 0.81<br>(224.1)                                                         | 0.68<br>(129.9) | 0.60<br>(80.4)  | 0.49<br>(53.6) | 0.25<br>(38.8) |
| BPM       | nr (113.5)             |                                                                         |                 |                 |                |                |
| CB        | 0.58 (102.9)           | 0.85<br>(388.4)                                                         | 0.73<br>(220.4) | 0.71<br>(132.1) | 0.57<br>(84.0) | 0.46<br>(57.2) |
| CD        | 0.36 (84.6)            | 0.64<br>(169.3)                                                         | 0.49<br>(98.1)  | 0.29<br>(61.5)  | 0.10<br>(42.0) | nr (31.3)      |
| GTA       | 0.70 (109.9)           | 0.97<br>(244.4)                                                         | 0.75<br>(142.5) | 0.73<br>(88.3)  | 0.67<br>(58.6) | 0.41<br>(42.0) |
| <b>C.</b> |                        | 3-Methoxy-2,2',4,4',6-pentachlorobiphenyl<br><b>(3-100)<sup>3</sup></b> |                 |                 |                |                |
| Column    | Programmed temperature | Isothermal                                                              |                 |                 |                |                |
|           |                        | 140°C                                                                   | 150°C           | 160°C           | 170°C          | 180°C          |
| 20B       | nr (108.9)             |                                                                         |                 |                 |                |                |
| BGB       | nr (105.0)             |                                                                         |                 |                 |                |                |
| BDM       | nr (90.1)              |                                                                         |                 |                 |                |                |
| BPM       | nr (83.8)              |                                                                         |                 |                 |                |                |
| CB        | nr (100.4)             |                                                                         |                 |                 |                |                |
| CD        | nr (82.3)              |                                                                         |                 |                 |                |                |
| GTA       | 0.60 (103.0)           | 0.77<br>(215.0)                                                         | 0.60<br>(124.5) | 0.52<br>(79.0)  | 0.29<br>(53.1) | nr (38.7)      |

**Table S1.B.** Structure, IUPAC name, abbreviation and resolution of methoxylated polychlorinated biphenyls on different enantioselective columns and using different temperature programs<sup>1,2</sup>.

|           |                        |                                                                        |                 |                 |                 |                 |
|-----------|------------------------|------------------------------------------------------------------------|-----------------|-----------------|-----------------|-----------------|
| <b>D.</b> |                        | 4-Methoxy-2,2',3,4',6-pentachlorobiphenyl<br>(4-91) <sup>3</sup>       |                 |                 |                 |                 |
| Column    | Programmed temperature | Isothermal                                                             |                 |                 |                 |                 |
|           |                        | 140°C                                                                  | 150°C           | 160°C           | 170°C           | 180°C           |
| 20B       | nr (125.8)             | na                                                                     | na              | nr              | nr              | nr              |
| BGB       | nr (116.6)             |                                                                        |                 |                 |                 |                 |
| BDM       | nr (106.2)             | 0.79<br>(404.7)                                                        | 0.71<br>(213.8) | 0.62<br>(131.0) | nr (81.6)       | nr (54.8)       |
| BPM       | nr (100.4)             |                                                                        |                 |                 |                 |                 |
| CB        | nr (114.0)             |                                                                        |                 |                 |                 |                 |
| CD        | nr (94.2)              |                                                                        |                 |                 |                 |                 |
| GTA       | nr (155.3)             |                                                                        |                 |                 |                 |                 |
| <b>E.</b> |                        | 3-Methoxy-2,2',4',5,6-pentachlorobiphenyl<br>(5-91) <sup>3</sup>       |                 |                 |                 |                 |
| Column    | Programmed temperature | Isothermal                                                             |                 |                 |                 |                 |
|           |                        | 140°C                                                                  | 150°C           | 160°C           | 170°C           | 180°C           |
| 20B       | nr (124.8)             | na                                                                     | na              | 0.94<br>(347.0) | 0.78<br>(205.2) | 0.59<br>(127.6) |
| BGB       | 0.75 (116.8)           | na                                                                     | 0.83<br>(416.1) | 0.90<br>(252.1) | 0.76<br>(152.9) | 0.68<br>(97.8)  |
| BDM       | 2.1 (105.5)            | 3.7<br>(426.9)                                                         | 3.3<br>(232.5)  | 2.1<br>(134.3)  | 1.5<br>(82.9)   | 1.4<br>(55.3)   |
| BPM       | 0.50 (99.3)            | 1.3<br>(331.4)                                                         | 0.84<br>(184.5) | 0.77<br>(109.2) | 0.54<br>(69.2)  | 0.46<br>(47.5)  |
| CB        | 1.3 (113.3)            | na                                                                     | 3.3<br>(398.8)  | 2.8<br>(230.3)  | 1.8<br>(137.4)  | 1.4<br>(87.1)   |
| CD        | 0.97 (93.9)            | 3.0<br>(309.8)                                                         | 1.9<br>(167.5)  | 1.4<br>(97.1)   | 0.97<br>(61.0)  | 0.75<br>(41.9)  |
| GTA       | nr (146.5)             | na                                                                     | na              | nr (131.6)      | nr (82.2)       | nr (55.3)       |
| <b>F.</b> |                        | 3,4-Dimethoxy-2,2',4',5,6-pentachlorobiphenyl<br>(4,5-91) <sup>3</sup> |                 |                 |                 |                 |
| Column    | Programmed temperature | Isothermal                                                             |                 |                 |                 |                 |
|           |                        | 140°C                                                                  | 150°C           | 160°C           | 170°C           | 180°C           |
| 20B       | nr (126.5)             |                                                                        |                 |                 |                 |                 |
| BGB       | nr (119.0)             |                                                                        |                 |                 |                 |                 |
| BDM       | nr (106.5)             |                                                                        |                 |                 |                 |                 |
| BPM       | nr (101.0)             |                                                                        |                 |                 |                 |                 |
| CB        | nr (114.6)             |                                                                        |                 |                 |                 |                 |
| CD        | nr (95.5)              |                                                                        |                 |                 |                 |                 |
| GTA       | nr (151.9)             |                                                                        |                 |                 |                 |                 |

**Table S1.C.** Structure, IUPAC name, abbreviation and resolution of methoxylated polychlorinated biphenyls on different enantioselective columns and using different temperature programs<sup>1,2</sup>.

|           |                        |                                                                   |                 |                 |                 |                |
|-----------|------------------------|-------------------------------------------------------------------|-----------------|-----------------|-----------------|----------------|
| <b>G.</b> |                        | 3-Methoxy-2,2',4,5',6-pentachlorobiphenyl<br>(3-103) <sup>3</sup> |                 |                 |                 |                |
| Column    | Programmed temperature | Isothermal                                                        |                 |                 |                 |                |
|           |                        | 140°C                                                             | 150°C           | 160°C           | 170°C           | 180°C          |
| 20B       | nr (107.9)             |                                                                   |                 |                 |                 |                |
| BGB       | 0.65 (102.1)           | 0.85<br>(323.0)                                                   | 0.79<br>(191.9) | 0.73<br>(119.3) | 0.63<br>(78.4)  | 0.54<br>(54.8) |
| BDM       | nr (88.7)              |                                                                   |                 |                 |                 |                |
| BPM       | nr (83.0)              |                                                                   |                 |                 |                 |                |
| CB        | nr (99.6)              |                                                                   |                 |                 |                 |                |
| CD        | nr (81.4)              |                                                                   |                 |                 |                 |                |
| GTA       | nr (97.8)              |                                                                   |                 |                 |                 |                |
| <b>H.</b> |                        | 4-Methoxy-2,2',3,5',6-pentachlorobiphenyl<br>(4-95) <sup>3</sup>  |                 |                 |                 |                |
| Column    | Programmed temperature | Isothermal                                                        |                 |                 |                 |                |
|           |                        | 140°C                                                             | 150°C           | 160°C           | 170°C           | 180°C          |
| 20B       | nr (124.8)             |                                                                   |                 |                 |                 |                |
| BGB       | 0.39 (114.5)           | na<br>(479.5)                                                     | 0.78<br>(370.3) | 0.69<br>(217.7) | 0.61<br>(134.4) | 0.53<br>(87.6) |
| BDM       | 0.41 (104.1)           | 0.76<br>(380.0)                                                   | 0.69<br>(210.9) | 0.58<br>(124.0) | 0.39<br>(77.7)  | nr (52.6)      |
| BPM       | nr (99.6)              |                                                                   |                 |                 |                 |                |
| CB        | nr (113.0)             |                                                                   |                 |                 |                 |                |
| CD        | nr (93.6)              |                                                                   |                 |                 |                 |                |
| GTA       | nr (145.3)             |                                                                   |                 |                 |                 |                |
| <b>I.</b> |                        | 3-Methoxy-2,2',5,5',6-pentachlorobiphenyl<br>(5-95) <sup>3</sup>  |                 |                 |                 |                |
| Column    | Programmed temperature | Isothermal                                                        |                 |                 |                 |                |
|           |                        | 140°C                                                             | 150°C           | 160°C           | 170°C           | 180°C          |
| 20B       | nr (123.3)             | na                                                                | na              | 0.50<br>(331.8) | nr (196.9)      | nr (122.7)     |
| BGB       | nr (113.4)             |                                                                   |                 |                 |                 |                |
| BDM       | 0.88 (102.9)           | 1.3<br>(389.1)                                                    | 1.1<br>(213.5)  | 0.90<br>(124.3) | 0.70<br>(77.5)  | 0.62<br>(52.3) |
| BPM       | nr (98.1)              |                                                                   |                 |                 |                 |                |
| CB        | 0.54 (111.9)           | na                                                                | 0.99<br>(369.8) | 0.95<br>(210.7) | 0.89<br>(126.9) | 0.76<br>(0.69) |
| CD        | 0.49 (92.9)            | 1.0<br>(284.7)                                                    | 0.86<br>(155.5) | 0.69<br>(91.2)  | 0.52<br>(57.9)  | nr (40.3)      |
| GTA       | nr (137.4)             | 0.61<br>(400.3)                                                   | 0.50<br>(222.4) | 0.32<br>(130.9) | nr (82.1)       | nr (55.3)      |

**Table S1.D.** Structure, IUPAC name, abbreviation and resolution of methoxylated polychlorinated biphenyls on different enantioselective columns and using different temperature programs<sup>1,2</sup>.

|           |                        |                                                                              |                 |                 |                 |                 |
|-----------|------------------------|------------------------------------------------------------------------------|-----------------|-----------------|-----------------|-----------------|
| <b>J.</b> |                        | 3,4-Dimethoxy-2,2',5,5',6-pentachlorobiphenyl<br><b>(4,5-95)<sup>3</sup></b> |                 |                 |                 |                 |
| Column    | Programmed temperature | Isothermal                                                                   |                 |                 |                 |                 |
|           |                        | 140°C                                                                        | 150°C           | 160°C           | 170°C           | 180°C           |
| 20B       | nr (124.6)             |                                                                              |                 |                 |                 |                 |
| BGB       | nr (115.4)             |                                                                              |                 |                 |                 |                 |
| BDM       | 0.49 (105.6)           | 0.86<br>(404.4)                                                              | 0.72<br>(228.6) | 0.55<br>(129.8) | 0.43<br>(80.8)  | 0.29<br>(54.2)  |
| BPM       | nr (99.4)              |                                                                              |                 |                 |                 |                 |
| CB        | nr (113.1)             | na                                                                           | 0.60<br>(377.0) | 0.53<br>(242.0) | 0.58<br>(130.7) | 0.41<br>(85.4)  |
| CD        | nr (94.3)              |                                                                              |                 |                 |                 |                 |
| GTA       | nr (141.9)             |                                                                              |                 |                 |                 |                 |
| <b>K.</b> |                        | 3-Methoxy-2,2',3',4,4',6-hexachlorobiphenyl<br><b>(3'-140)<sup>3</sup></b>   |                 |                 |                 |                 |
| Column    | Programmed temperature | Isothermal                                                                   |                 |                 |                 |                 |
|           |                        | 140°C                                                                        | 150°C           | 160°C           | 170°C           | 180°C           |
| 20B       | nr (103.0)             |                                                                              |                 |                 |                 |                 |
| BGB       | 0.54 (121.5)           | na                                                                           | na              | 0.72<br>(295.8) | 0.72<br>(180.2) | 0.69<br>(115.2) |
| BDM       | nr (112.9)             |                                                                              |                 |                 |                 |                 |
| BPM       | nr (104.4)             |                                                                              |                 |                 |                 |                 |
| CB        | nr (117.8)             |                                                                              |                 |                 |                 |                 |
| CD        | nr (98.5)              |                                                                              |                 |                 |                 |                 |
| GTA       | 0.76 (171.3)           | na                                                                           | 1.0<br>(314.9)  | 0.90<br>(180.8) | 0.73<br>(110.2) | 0.60<br>(71.9)  |
| <b>L.</b> |                        | 4-Methoxy-2,2',3,3',4',6-hexachlorobiphenyl<br><b>(4'-132)<sup>3</sup></b>   |                 |                 |                 |                 |
| Column    | Programmed temperature | Isothermal                                                                   |                 |                 |                 |                 |
|           |                        | 140°C                                                                        | 150°C           | 160°C           | 170°C           | 180°C           |
| 20B       | nr (161.0)             | na                                                                           | na              | na              | nr              | nr              |
| BGB       | nr (133.2)             |                                                                              |                 |                 |                 |                 |
| BDM       | nr (144.2)             |                                                                              |                 |                 |                 |                 |
| BPM       | nr (134.8)             |                                                                              |                 |                 |                 |                 |
| CB        | nr (130.8)             |                                                                              |                 |                 |                 |                 |
| CD        | nr (110.0)             |                                                                              |                 |                 |                 |                 |
| GTA       | nr (293.1)             |                                                                              |                 |                 |                 |                 |

**Table S1.E.** Structure, IUPAC name, abbreviation and resolution of methoxylated polychlorinated biphenyls on different enantioselective columns and using different temperature programs<sup>1,2</sup>.

|           |                        |                                                                                   |                 |                 |                 |                |
|-----------|------------------------|-----------------------------------------------------------------------------------|-----------------|-----------------|-----------------|----------------|
| <b>M.</b> |                        | 3-Methoxy-2,2',3',4',5,6-hexachlorobiphenyl<br><b>(5'-132)<sup>3</sup></b>        |                 |                 |                 |                |
| Column    | Programmed temperature | Isothermal                                                                        |                 |                 |                 |                |
|           |                        | 140°C                                                                             | 150°C           | 160°C           | 170°C           | 180°C          |
| 20B       | nr (158.4)             | na                                                                                | na              | na              | na              | na             |
| BGB       | 0.99 (132.6)           | na                                                                                | na              | na              | 0.85<br>(260.7) | 1.0<br>(193.6) |
| BDM       | 1.2 (143.3)            | na                                                                                | na              | 2.5<br>(319.8)  | 1.4<br>(181.5)  | 1.5<br>(109.9) |
| BPM       | 0.49 (131.9)           | na                                                                                | na              | 0.75<br>(256.9) | 0.72<br>(149.5) | 0.54<br>(92.8) |
| CB        | 0.91 (130.1)           | na                                                                                | na              | na              | 1.4<br>(183.6)  | 1.5<br>(314.2) |
| CD        | 0.74 (109.7)           | na                                                                                | 2.3<br>(420.2)  | 1.8<br>(224.3)  | 1.2<br>(128.1)  | 0.92<br>(78.8) |
| GTA       | nr (269.9)             | na                                                                                | na              | nr (344.5)      | nr (198.0)      | nr (120.5)     |
| <b>N.</b> |                        | 3,4-Dimethoxy-2,2',3',4',5,6-hexachlorobiphenyl<br><b>(4',5'-132)<sup>3</sup></b> |                 |                 |                 |                |
| Column    | Programmed temperature | Isothermal                                                                        |                 |                 |                 |                |
|           |                        | 140°C                                                                             | 150°C           | 160°C           | 170°C           | 180°C          |
| 20B       | nr (161.4)             | na                                                                                | na              | na              | nr              | nr             |
| BGB       | nr (134.8)             |                                                                                   |                 |                 |                 |                |
| BDM       | nr (147.4)             |                                                                                   |                 |                 |                 |                |
| BPM       | nr (134.9)             |                                                                                   |                 |                 |                 |                |
| CB        | nr (131.1)             |                                                                                   |                 |                 |                 |                |
| CD        | nr (111.0)             |                                                                                   |                 |                 |                 |                |
| GTA       | nr (280.3)             |                                                                                   |                 |                 |                 |                |
| <b>O.</b> |                        | 3-Methoxy-2,2',3',4,6,6'-hexachlorobiphenyl<br><b>(3'-150)<sup>3</sup></b>        |                 |                 |                 |                |
| Column    | Programmed temperature | Isothermal                                                                        |                 |                 |                 |                |
|           |                        | 140°C                                                                             | 150°C           | 160°C           | 170°C           | 180°C          |
| 20B       | nr (117.7)             |                                                                                   |                 |                 |                 |                |
| BGB       | nr (111.6)             | nr (477.0)                                                                        | 0.12<br>(306.3) | 0.08<br>(184.2) | nr (116.1)      | nr (77.4)      |
| BDM       | 0.31 (97.6)            | 0.60<br>(287.3)                                                                   | 0.52<br>(163.5) | 0.42<br>(98.8)  | 0.25<br>(64.0)  | nr (44.9)      |
| BPM       | nr (91.6)              |                                                                                   |                 |                 |                 |                |
| CB        | nr (107.5)             |                                                                                   |                 |                 |                 |                |
| CD        | 0.39 (89.2)            | 1.2<br>(290.8)                                                                    | 0.91<br>(158.3) | 0.63<br>(92.5)  | 0.49<br>(58.5)  | 0.20<br>(40.5) |
| GTA       | nr (122.9)             |                                                                                   |                 |                 |                 |                |



**Table S1.F.** Structure, IUPAC name, abbreviation and resolution of methoxylated polychlorinated biphenyls on different enantioselective columns and using different temperature programs<sup>1,2</sup>.

|           |                                                                                     |                                                                                 |                 |                 |                 |                 |
|-----------|-------------------------------------------------------------------------------------|---------------------------------------------------------------------------------|-----------------|-----------------|-----------------|-----------------|
| <b>P.</b> | 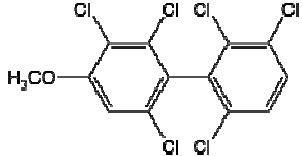   | 4-Methoxy-2,2',3,3',6,6'-hexachlorobiphenyl<br><b>(4-136)<sup>3</sup></b>       |                 |                 |                 |                 |
| Column    | Programmed temperature                                                              | Isothermal                                                                      |                 |                 |                 |                 |
|           |                                                                                     | 140°C                                                                           | 150°C           | 160°C           | 170°C           | 180°C           |
| 20B       | nr (141.0)                                                                          |                                                                                 |                 |                 |                 |                 |
| BGB       | nr (123.9)                                                                          |                                                                                 |                 |                 |                 |                 |
| BDM       | 0.34 (119.1)                                                                        | na                                                                              | 0.75<br>(337.1) | 0.66<br>(191.7) | 0.51<br>(115.5) | 0.43<br>(74.5)  |
| BPM       | nr (113.5)                                                                          |                                                                                 |                 |                 |                 |                 |
| CB        | 0.18 (121.5)                                                                        | na                                                                              | 0.83<br>(420.4) | 0.64<br>(316.7) | 0.58<br>(195.3) | 0.53<br>(120.9) |
| CD        | nr (101.5)                                                                          | 0.64<br>(445.5)                                                                 | 0.47<br>(239.0) | 0.30<br>(136.5) | nr (83.5)       | nr (55.1)       |
| GTA       | nr (195.5)                                                                          |                                                                                 |                 |                 |                 |                 |
| <b>Q.</b> |    | 3-Methoxy-2,2',3',5,6,6'-hexachlorobiphenyl<br><b>(5-136)<sup>3</sup></b>       |                 |                 |                 |                 |
| Column    | Programmed temperature                                                              | Isothermal                                                                      |                 |                 |                 |                 |
|           |                                                                                     | 140°C                                                                           | 150°C           | 160°C           | 170°C           | 180°C           |
| 20B       | nr (137.5)                                                                          |                                                                                 |                 |                 |                 |                 |
| BGB       | 0.54 (114.5)                                                                        | na                                                                              | na              | 0.67<br>(316.2) | 0.67<br>(194.8) | 0.63<br>(122.2) |
| BDM       | nr (115.2)                                                                          |                                                                                 |                 |                 |                 |                 |
| BPM       | nr (109.7)                                                                          |                                                                                 |                 |                 |                 |                 |
| CB        | nr (119.6)                                                                          |                                                                                 |                 |                 |                 |                 |
| CD        | nr (99.9)                                                                           | 0.64<br>(427.4)                                                                 | nr (228.8)      | nr (129.8)      | nr (79.1)       | nr (52.3)       |
| GTA       | nr (178.5)                                                                          |                                                                                 |                 |                 |                 |                 |
| <b>R.</b> |  | 3,4-Dimethoxy-2,2',3',5,6,6'-hexachlorobiphenyl<br><b>(4,5-136)<sup>3</sup></b> |                 |                 |                 |                 |
| Column    | Programmed temperature                                                              | Isothermal                                                                      |                 |                 |                 |                 |
|           |                                                                                     | 140°C                                                                           | 150°C           | 160°C           | 170°C           | 180°C           |
| 20B       | nr (138.0)                                                                          |                                                                                 |                 |                 |                 |                 |
| BGB       | nr (123.2)                                                                          |                                                                                 |                 |                 |                 |                 |
| BDM       | nr (118.1)                                                                          |                                                                                 |                 |                 |                 |                 |
| BPM       | nr (110.2)                                                                          |                                                                                 |                 |                 |                 |                 |
| CB        | nr (120.1)                                                                          |                                                                                 |                 |                 |                 |                 |
| CD        | nr (101.2)                                                                          |                                                                                 |                 |                 |                 |                 |
| GTA       | nr (179.1)                                                                          |                                                                                 |                 |                 |                 |                 |

**Table S1.G.** Structure, IUPAC name, abbreviation and resolution of methoxylated polychlorinated biphenyls on different enantioselective columns and using different temperature programs<sup>1,2</sup>.

|           |                        |                                                                      |                 |                 |                 |                |
|-----------|------------------------|----------------------------------------------------------------------|-----------------|-----------------|-----------------|----------------|
| <b>S.</b> |                        | 3-Methoxy-2,2',4,4',5',6-hexachlorobiphenyl<br>(3'-154) <sup>3</sup> |                 |                 |                 |                |
| Column    | Programmed temperature | Isothermal                                                           |                 |                 |                 |                |
|           |                        | 140°C                                                                | 150°C           | 160°C           | 170°C           | 180°C          |
| 20B       | nr (120.0)             |                                                                      |                 |                 |                 |                |
| BGB       | 0.96 (116.2)           | na<br>(480.2)                                                        | 1.8<br>(403.2)  | 1.4<br>(236.5)  | 1.3<br>(145.4)  | 1.1<br>(94.1)  |
| BDM       | 0.52 (104.4)           | 1.1<br>(398.1)                                                       | 0.87<br>(218.3) | 0.69<br>(126.9) | 0.47<br>(79.0)  | 0.39<br>(53.1) |
| BPM       | nr (96.0)              |                                                                      |                 |                 |                 |                |
| CB        | 0.48 (112.1)           | na                                                                   | 0.90<br>(373.3) | 0.85<br>(212.7) | 0.68<br>(128.2) | 0.49<br>(82.3) |
| CD        | 0.46 (93.1)            | 0.91<br>(281.8)                                                      | 0.76<br>(155.3) | 0.57<br>(91.8)  | 0.43<br>(58.7)  | nr (41.0)      |
| GTA       | nr (141.5)             |                                                                      |                 |                 |                 |                |
| <b>T.</b> |                        | 3-Methoxy-2,2',4',5,5',6-hexachlorobiphenyl<br>(5-149) <sup>3</sup>  |                 |                 |                 |                |
| Column    | Programmed temperature | Isothermal                                                           |                 |                 |                 |                |
|           |                        | 140°C                                                                | 150°C           | 160°C           | 170°C           | 180°C          |
| 20B       | nr (142.8)             | na                                                                   | na              | nr              | nr              | nr             |
| BGB       | nr (126.8)             |                                                                      |                 |                 |                 |                |
| BDM       | 0.29 (127.5)           | na                                                                   | 1.0<br>(426.9)  | 0.90<br>(234.4) | 0.68<br>(136.5) | 0.48<br>(85.0) |
| BPM       | nr (117.5)             |                                                                      |                 |                 |                 |                |
| CB        | nr (124.3)             |                                                                      |                 |                 |                 |                |
| CD        | nr (104.3)             | na                                                                   | 0.77<br>(302.0) | 0.77<br>(166.2) | 0.61<br>(98.2)  | nr (62.8)      |
| GTA       | 0.50 (217.3)           | na                                                                   | 0.67<br>(462.6) | 0.57<br>(257.2) | 0.35<br>(151.1) | nr (94.5)      |

<sup>1</sup> The resolution  $R_s$  of atropisomers was calculated as  $R_s = (t_{R2} - t_{R1}) / 0.5(BW_1 + BW_2)$ , where  $T_{R1}$  and  $T_{R2}$  are the retention time and  $BW_1$  and  $BW_2$  are the baseline peak width of the first and the second eluting atropisomer, respectively (6); the retention time of first eluting peak is given in parentheses.

<sup>2</sup> Abbreviations of columns: 20B - HP-Chiral-20B; BGB - BGB-172; BDM - Chiral-Dex B-DM, BPM - Chiral-Dex B-PM; CB - Cyclosil-B; CD - Chirasil-Dex (CD); GTA - Chiral-Dex G-TA. See Table S3 for additional information. <sup>3</sup> Abbreviated name of the metabolite. nr – no peak resolution was observed. na – the compound did not elute from the column within 220 min at 180°C or 500 min at 140°C.

**Table S2.** Summary of the best resolution achieved in the isothermal analysis for the atropisomers of the MeO-PCBs.<sup>a</sup>

| Compound | Column            |                          |                         |                   |                  |            |              |
|----------|-------------------|--------------------------|-------------------------|-------------------|------------------|------------|--------------|
|          | 20B               | BGB                      | BDM                     | BPM               | CB               | CD         | GTA          |
| 3-98     | nr                | nr                       | 0.81                    | nr                | 0.85             | 0.64       | <b>0.97</b>  |
| 3-100    | nr                | nr                       | nr                      | nr                | nr               | nr         | <b>0.77</b>  |
| 4-91     | nr                | nr                       | <b>0.79</b>             | nr                | nr               | nr         | nr           |
| 5-91     | 0.94 <sup>#</sup> | 0.90 <sup>#</sup>        | <b>3.7</b>              | 1.3               | 3.3*             | 3.0        | nr           |
| 3-103    | nr                | <b>0.85</b>              | nr                      | nr                | nr               | nr         | nr           |
| 4-95     | nr                | <b>0.78</b> *            | 0.76                    | nr                | nr               | nr         | nr           |
| 5-95     | 0.50*             | nr                       | <b>1.3</b>              | nr                | 0.99*            | 1.0        | 0.61         |
| 4,5-95   | nr                | nr                       | <b>0.86</b>             | nr                | 0.60*            | nr         | nr           |
| 3'-140   | nr                | 0.72 <sup>#</sup>        | nr                      | nr                | nr               | nr         | <b>1.0</b> * |
| 5'-132   | nr                | 1.0 <sup>‡</sup>         | <b>2.5</b> <sup>#</sup> | 0.75 <sup>#</sup> | 1.5 <sup>‡</sup> | 2.3*       | nr           |
| 3'-150   | nr                | nr                       | 0.60                    | nr                | nr               | <b>1.2</b> | nr           |
| 4-136    | nr                | nr                       | 0.75*                   | nr                | <b>0.83</b> *    | 0.64       | nr           |
| 5-136    | nr                | <b>0.67</b> <sup>#</sup> | nr                      | nr                | nr               | 0.64       | nr           |
| 3'-154   | nr                | <b>1.8</b> *             | 1.1                     | nr                | 0.90*            | 0.91       | nr           |
| 5-149    | nr                | nr                       | <b>1.0</b> *            | nr                | nr               | 0.77*      | 0.67*        |

<sup>a</sup>This table contains only MeO-PCBs for which atropisomers resolved on at least one column. For a full list of the MeO-PCBs studied, see Table S1. Unless otherwise stated, the isothermal analysis was performed at 140°C using the following temperature program: 50°C for 1 min, 10°C/min to 140°C, hold for 500 min, 10°C to 225°C, hold for 10 min. The best separation for each compound is highlighted in **bold**; \* - isothermal analysis performed at 150°C; # - isothermal analysis performed at 160°C; ‡ - isothermal analysis performed at 180°C. Abbreviations of columns: 20B - HP-Chiral-20B; BGB - BGB-172; BDM - Chiral-Dex B-DM, BPM - Chiral-Dex B-PM; CB - Cyclosil-B; CD - Chirasil-Dex (CD); GTA - Chiral-Dex G-TA. See Table S3 for additional information regarding the columns.

**Table S3.** List of the characteristics of the enantioselective columns used for the separation of methoxylated PCB derivatives.

| Designation    | Abbreviation | Chiral stationary phase                                       | Cyclodextrin type      | Max temp. | Parameters                        | Supplier                           |
|----------------|--------------|---------------------------------------------------------------|------------------------|-----------|-----------------------------------|------------------------------------|
| HP-Chiral-20B  | 20B          | 20% in (35%-phenyl)-methylpolysiloxane                        | $\beta$ -cyclodextrin  | 250°C     | 30 m x 250 $\mu$ m x 0.25 $\mu$ m | Agilent Santa Clara, CA            |
| BGB-172        | BGB          | 20% tert-butyl dimethyl-silyl-                                | $\beta$ -cyclodextrin  | 250°C     | 30 m x 250 $\mu$ m x 0.25 $\mu$ m | BGB Analytic Boeckten, Switzerland |
| ChiralDex B-DM | BDM          | 2,3-di-O-methyl-6-tert-butyl-silyl-                           | $\beta$ -cyclodextrin  | 200°C     | 30 m x 250 $\mu$ m x 0.12 $\mu$ m | Supelco Analytical St. Louis, MO   |
| ChiralDex B-PM | BPM          | 2,3,6-tri-O-methyl-silyl-                                     | $\beta$ -cyclodextrin  | 200°C     | 30 m x 250 $\mu$ m x 0.12 $\mu$ m | Supelco Analytical St. Louis, MO   |
| Cyclosil-B     | CB           | 30% hepatkis (2,3-di-O-methyl-6-O-tert-butyl dimethyl-silyl)- | $\beta$ -cyclodextrin  | 250°C     | 30 m x 250 $\mu$ m x 0.25 $\mu$ m | Agilent Santa Clara, CA            |
| Chirasil-Dex   | CD           | 2,3,6-tri-O-methyl-                                           | $\beta$ -cyclodextrin  | 225°C     | 30 m x 250 $\mu$ m x 0.39 $\mu$ m | Varian (Agilent) Santa Clara, CA   |
| ChiralDex G-TA | GTA          | 2,6-di-O-pentyl-3-trifluoroacetyl-                            | $\gamma$ -cyclodextrin | 180°C     | 30 m x 250 $\mu$ m x 0.12 $\mu$ m | Supelco Analytical St. Louis, MO   |

**Table S4.** Amounts and enantiomeric fractions of hydroxylated PCBs (analyzed as methoxylated derivatives) from microsomal incubations of PCBs 91, 95, 132 and 149 determined on six enantioselective columns<sup>1</sup> during isothermal analysis at 160°C. The resolutions of the atropisomers in the racemic standards are given in parentheses.

| Enantioselective column |            |                      | BGB*                     | BDM                | BPM                       | CB                       | CD                        | GTA*                   |
|-------------------------|------------|----------------------|--------------------------|--------------------|---------------------------|--------------------------|---------------------------|------------------------|
| Parent                  | Metabolite | Amount formed [nmol] |                          |                    |                           |                          |                           |                        |
| PCB 91                  | 3-100      | 0.4                  | nr                       | nr                 | nr                        | nr                       | nr                        | E1 (0.40)              |
|                         | 5-91       | 160                  | 0.46 (0.81)              | 0.54 <sup>\$</sup> | 0.54 <sup>\$</sup> (0.94) | 0.54 <sup>#</sup> (3.0)  | 0.54 <sup>\$</sup> (1.2)  | nr                     |
|                         | 4-91       | 1.2                  | nr                       | nd                 | nr                        | nr                       | nd                        | nr                     |
|                         | 4,5-91     | 0.4                  | nr                       | nd                 | nr                        | nr                       | nd                        | nr                     |
| PCB 95                  | 3-103      |                      | E2 (0.58)                | nr                 | nd                        | nr                       | nr                        | nr                     |
|                         | 4-95       |                      | nr                       | 0.51 (0.69)        | nd                        | nr                       | nd                        | nr                     |
|                         | 5-95       | 70                   | nr                       | 0.36 <sup>\$</sup> | nr                        | 0.32 <sup>\$</sup>       | 0.33 <sup>\$</sup> (0.70) | E1 <sup>^</sup> (0.26) |
|                         | 4,5-95     |                      | nr                       | nd                 | nd                        | nd                       | nd                        | nr                     |
|                         | X-95       |                      | 0.68                     | nr                 | nr                        | 0.33                     | 0.33                      | nr                     |
| PCB 132                 | 3'-140     | 1                    | E1 (0.40)                | nd                 | nr                        | nd                       | nd                        | nd                     |
|                         | 4'-132     | 120                  | nr                       | nr                 | nr                        | nr                       | nr                        | nr                     |
|                         | 5'-132     | 8                    | 0.71 <sup>\$.&amp;</sup> | 0.30 <sup>\$</sup> | 0.28 <sup>\$</sup>        | 0.31 <sup>\$.&amp;</sup> | 0.31 (1.8)                | nr                     |
|                         | 4',5'-132  | 0.5                  | nr                       | nr                 | nr                        | nr                       | nr                        | nr                     |
| PCB149                  | 3-154      | 3                    | E2 (1.0)                 | nd                 | nr                        | E1 (0.64)                | nd                        | nr                     |
|                         | 5-149      | 20                   | nr                       | 0.66 (0.83)        | nr                        | 0.65 (0.68)              | 0.65 (0.75)               | 0.29 (0.45)            |

<sup>1</sup> The 20B column was not used because it only resolved 5-91. \* Reverse elution order of atropisomers compared to the other columns investigated; <sup>\$</sup> the major metabolite co-elutes with minor metabolites and the EF was not determined in the racemic standard and/or the incubation sample; <sup>#</sup> EF of standard = 0.55; <sup>^</sup> the EF value was not determined due to the poor resolution; however, a small shoulder corresponding to the second eluting peak indicated an enrichment of the first eluting atropisomer; <sup>&</sup> analysis at 170°C. Abbreviations of columns: BGB - BGB-172; BDM - Chiral-Dex B-DM, BPM - Chiral-Dex B-PM; CB - Cyclosil-B; CD - Chirasil-Dex (CD); GTA - Chiral-Dex G-TA. See Table S3 for additional information; nr – metabolite does not resolve on the column; E1 and E2 – only the first or second atropisomer was observed for these minor metabolites; nd – metabolite not detected in the incubation.

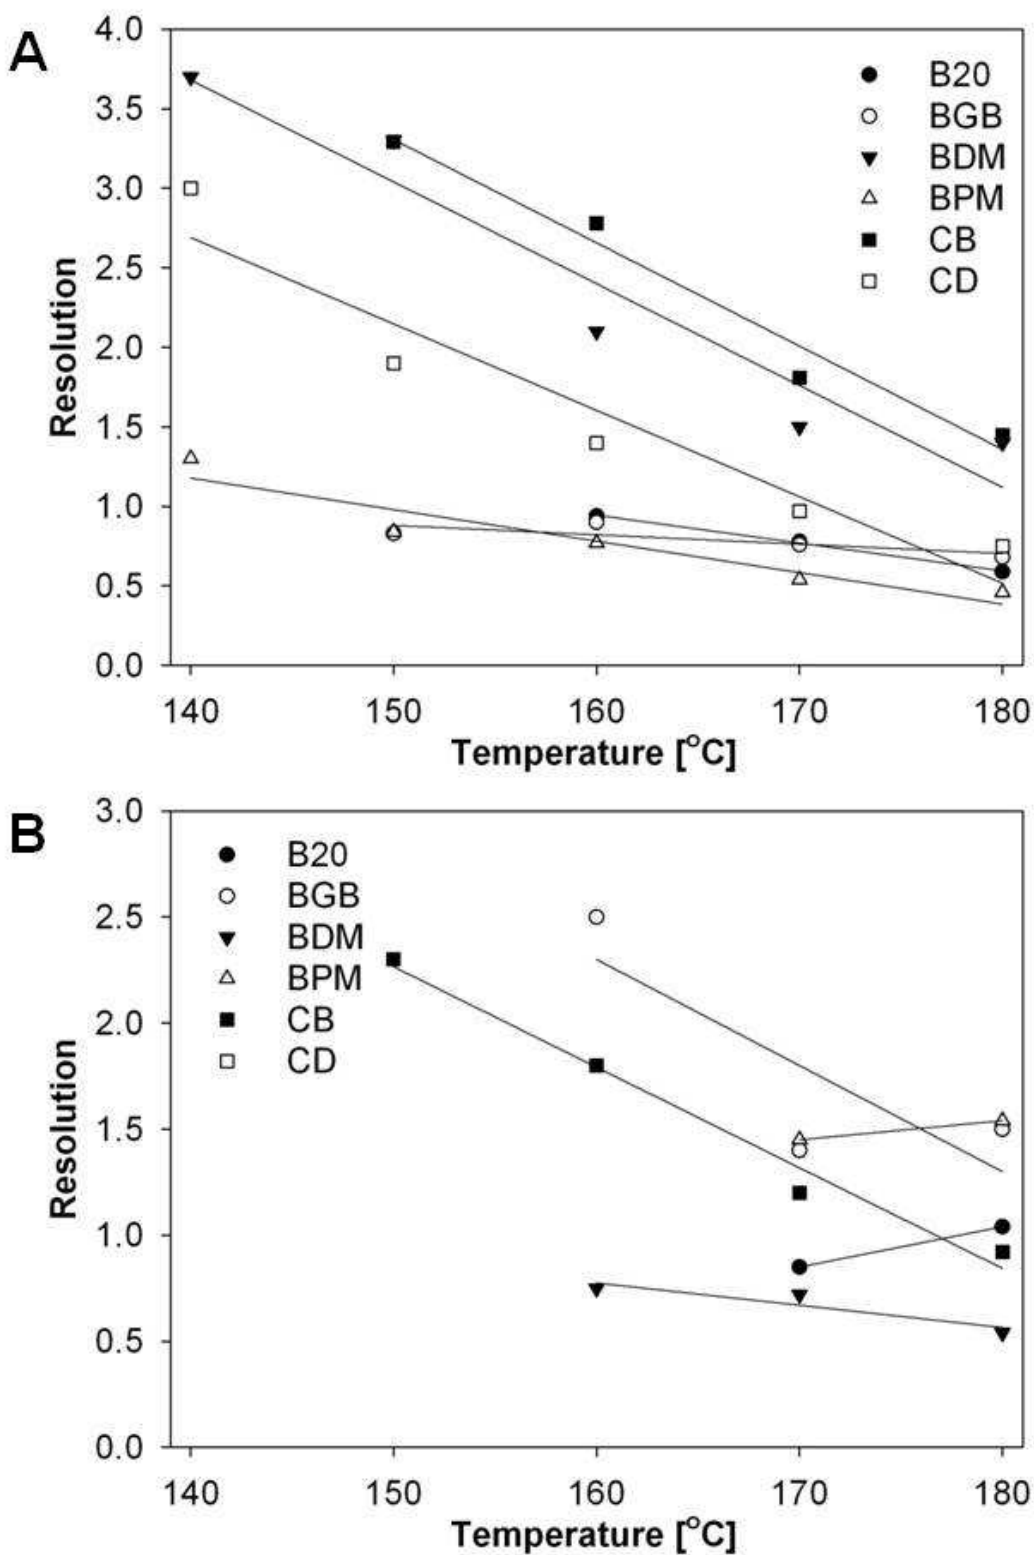

**Figure S1.** The resolution of 5-methoxylated PCBs decreases with increasing temperature. The resolution on different enantioselective columns is plotted against temperature of isothermal analysis in the range of 140°C to 180°C for (A) 5-91 and (B) 5'-132. Abbreviations of columns: 20B - HP-Chiral-

20B; BGB - BGB-172; BDM - Chiral-Dex B-DM, BPM - Chiral-Dex B-PM; CB - Cyclosil-B; CD - Chirasil-Dex (CD); GTA - Chiral-Dex G-TA. See Table S3 for additional information. The resolution  $R_s$  of atropisomers was calculated as  $R_s=(t_{R2}-t_{R1})/0.5(BW_1+BW_2)$ , where  $T_{R1}$  and  $T_{R2}$  are the retention time and  $BW_1$  and  $BW_2$  are the baseline peak width of the first and the second eluting atropisomer, respectively (6).

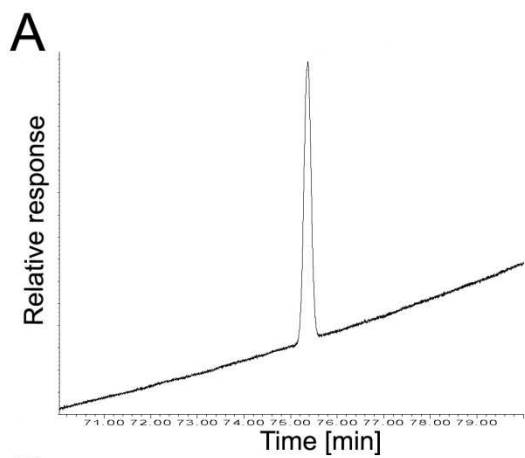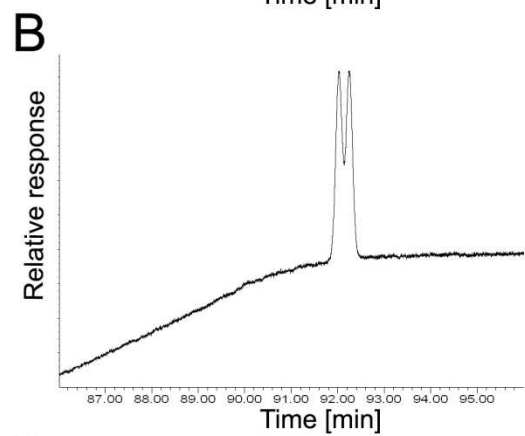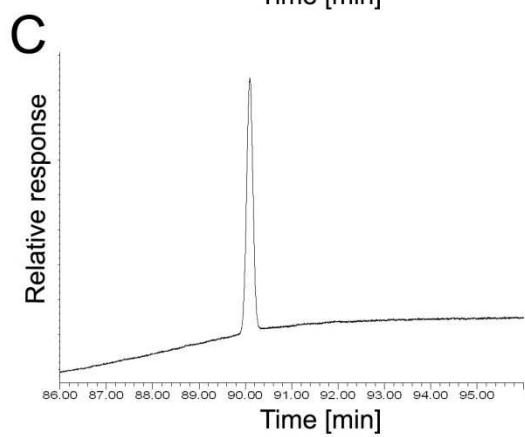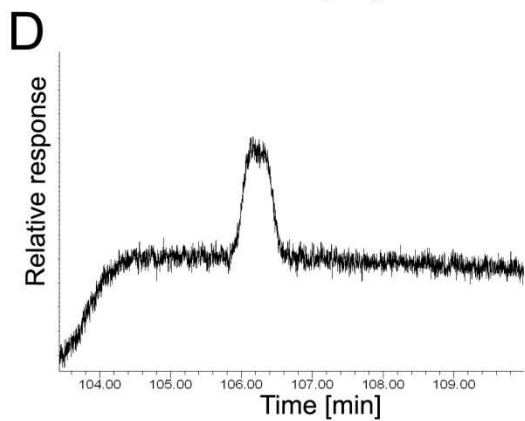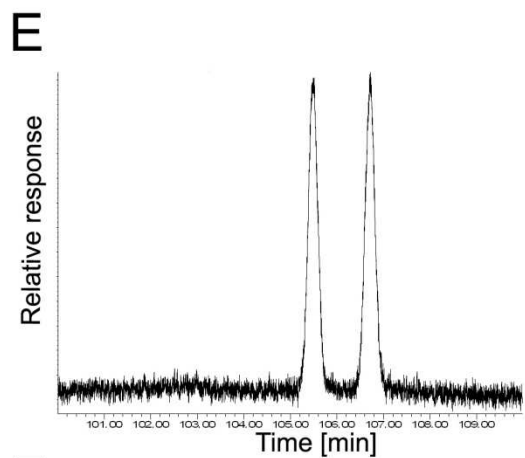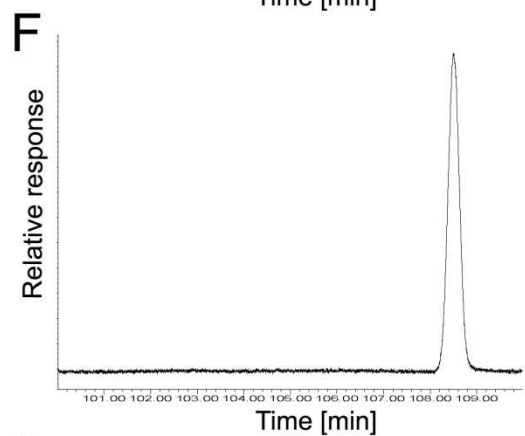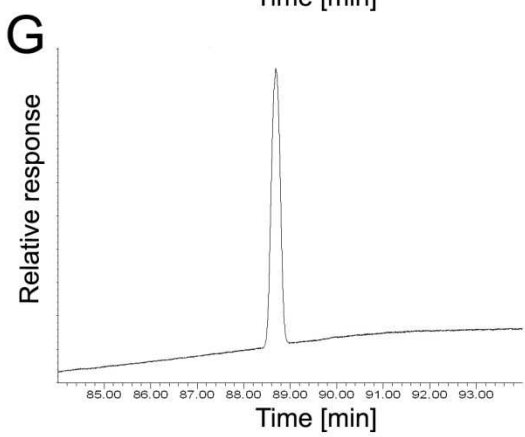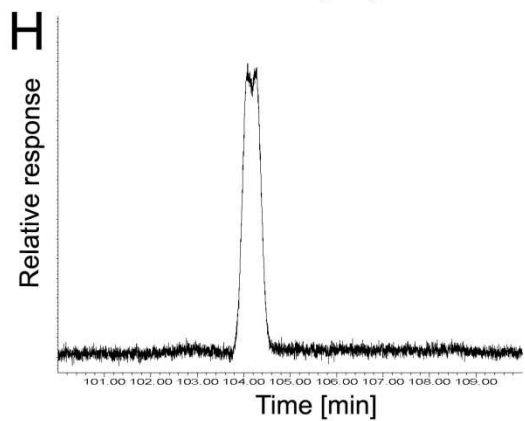



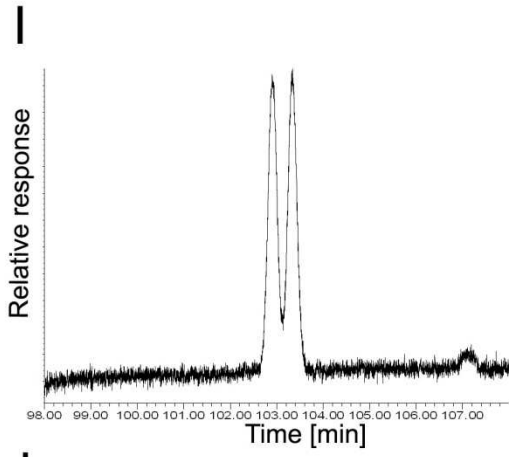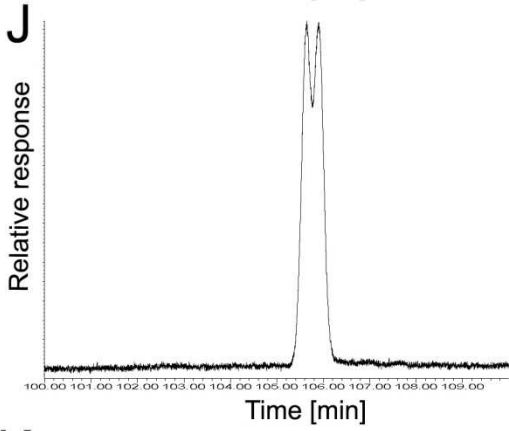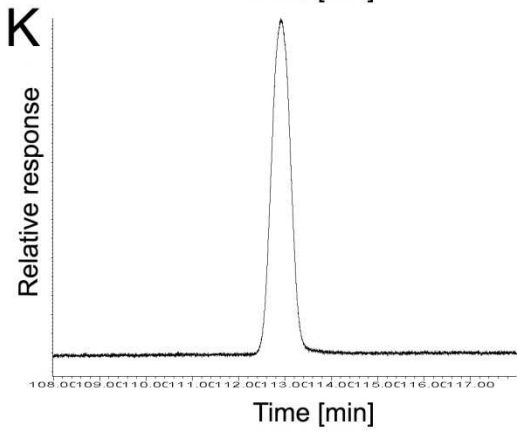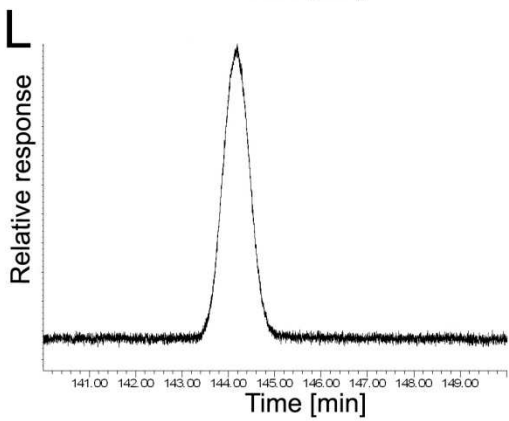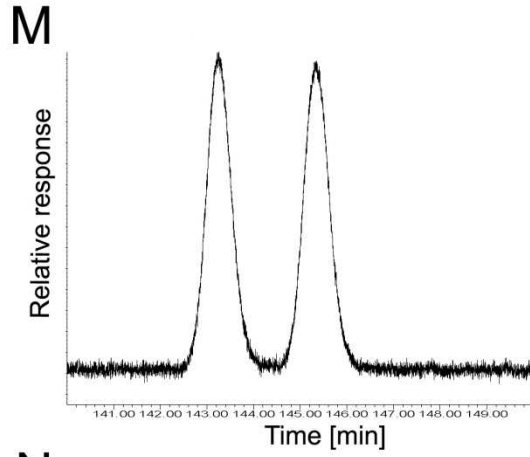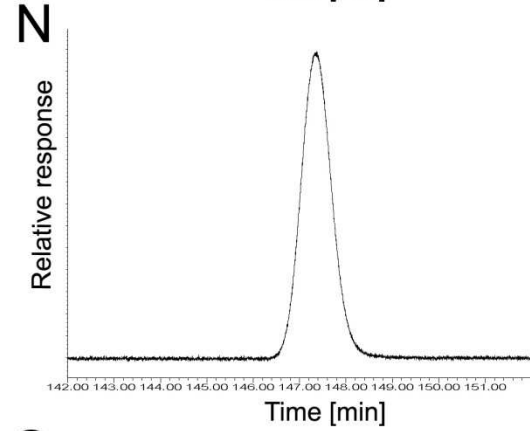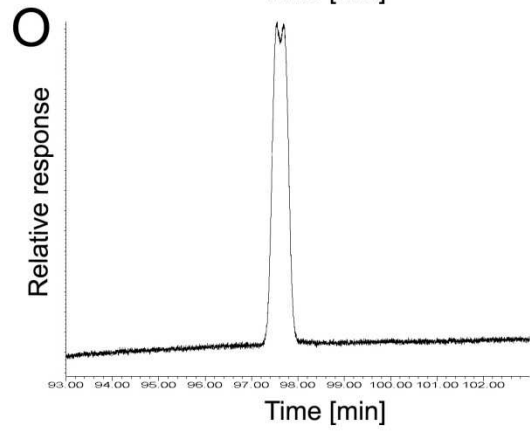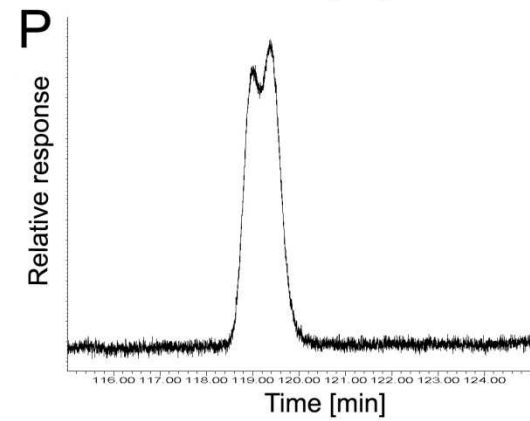

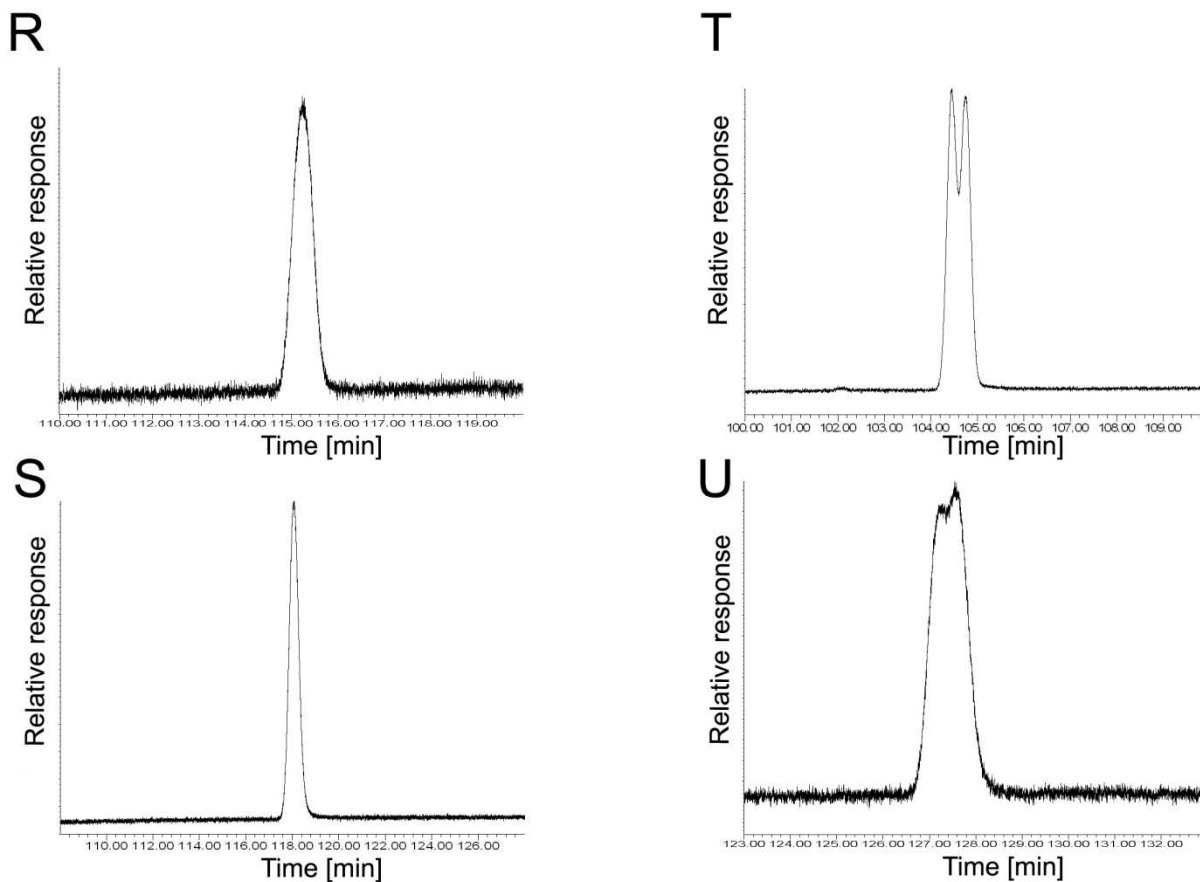

**Figure S2A.** Resolution of all studied methoxylated compounds on the ChiralDex B-DM column using programmed temperature analysis. This column resolved 11 out of 20 studied metabolites. A. 3-50; B. 3-98 ( $R_s=0.55$ ); C. 3-100; D. 4-91; E. 5-91 ( $R_s=2.1$ ); F. 4,5-91; G. 3-103; H. 4-95 ( $R_s=0.41$ ); I. 5-95 ( $R_s=0.88$ ); J. 4,5-95 ( $R_s=0.49$ ); K. 3'-140; L. 4'-132; M. 5'-132 ( $R_s=1.2$ ); N. 4',5'-132; O. 3-150 ( $R_s=0.31$ ); P. 4-136 ( $R_s=0.34$ ); R. 5-136; S. 4,5-136; T. 3-154 ( $R_s=0.52$ ); U. 5-149 ( $R_s=0.29$ ). The resolution  $R_s$  of atropisomers was calculated as  $R_s=(t_{R2}-t_{R1})/0.5(BW_1+BW_2)$ , where  $T_{R1}$  and  $T_{R2}$  are the retention time and  $BW_1$  and  $BW_2$  are the baseline peak width of the first and the second eluting atropisomer, respectively (6).

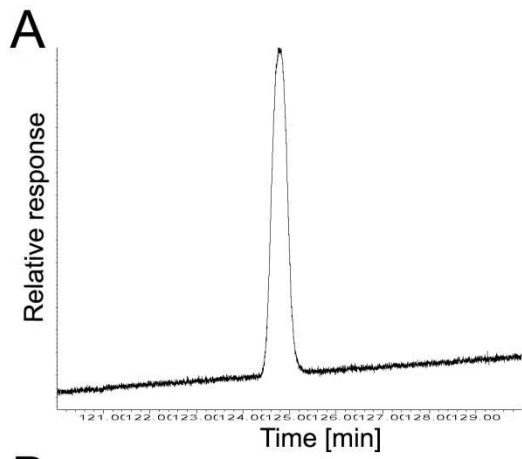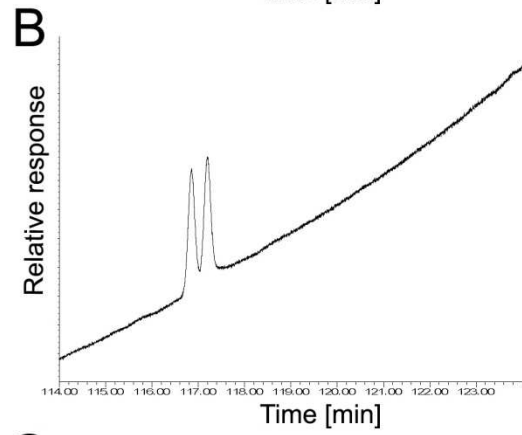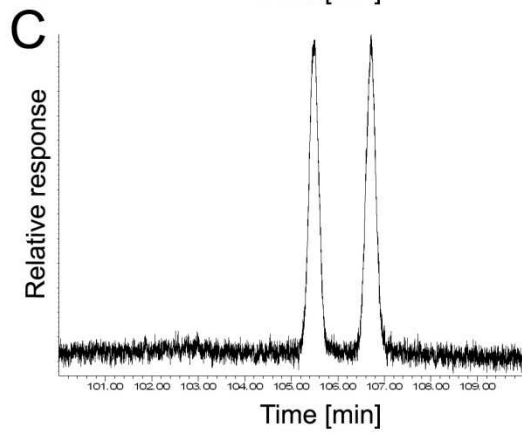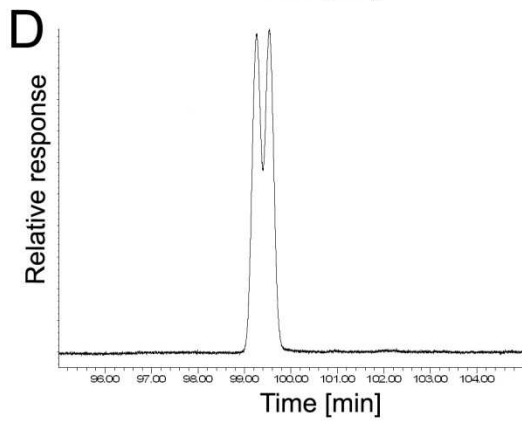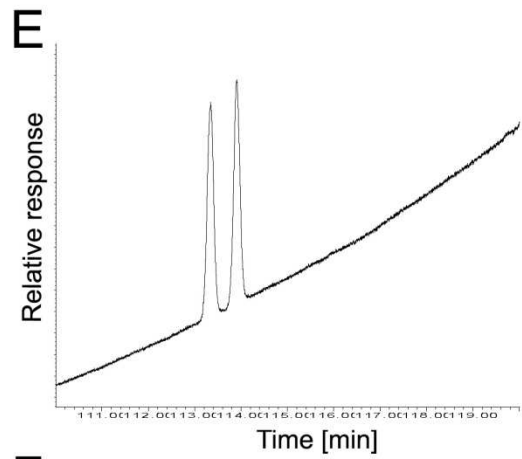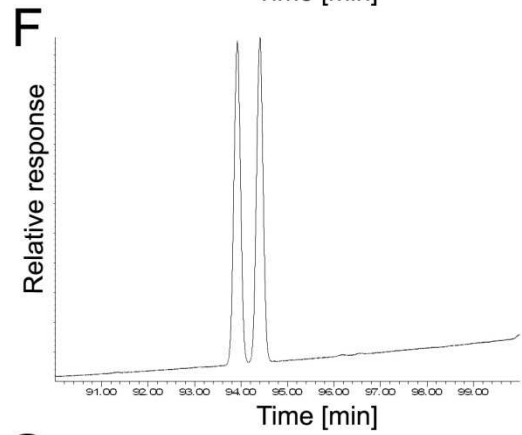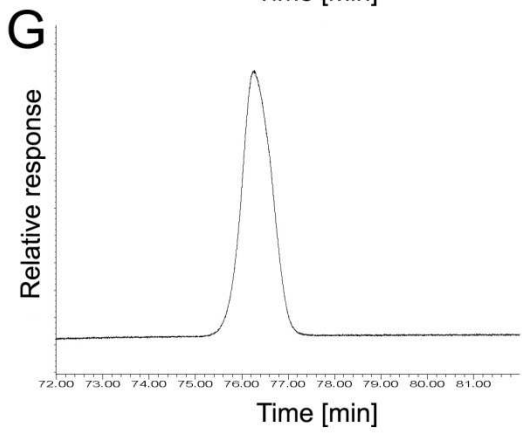

**Figure S2B.** Resolution of 5-91 on all enantioselective columns using programmed temperature analysis. A. HP Chiral 20B; B. BGB-172 ( $R_s=0.75$ ); C. Chiral-Dex B-DM ( $R_s=2.1$ ); D. Chiral-Dex B-PM ( $R_s=0.50$ ); E. Cyclosil-B ( $R_s=1.3$ ); F. Chirasil-Dex ( $R_s=0.97$ ); G. Chiral-Dex G-TA. The resolution  $R_s$  of atropisomers was calculated as  $R_s=(t_{R2}-t_{R1})/0.5(BW_1+BW_2)$ , where  $T_{R1}$  and  $T_{R2}$  are the retention time and  $BW_1$  and  $BW_2$  are the baseline peak width of the first and the second eluting atropisomer, respectively (6).

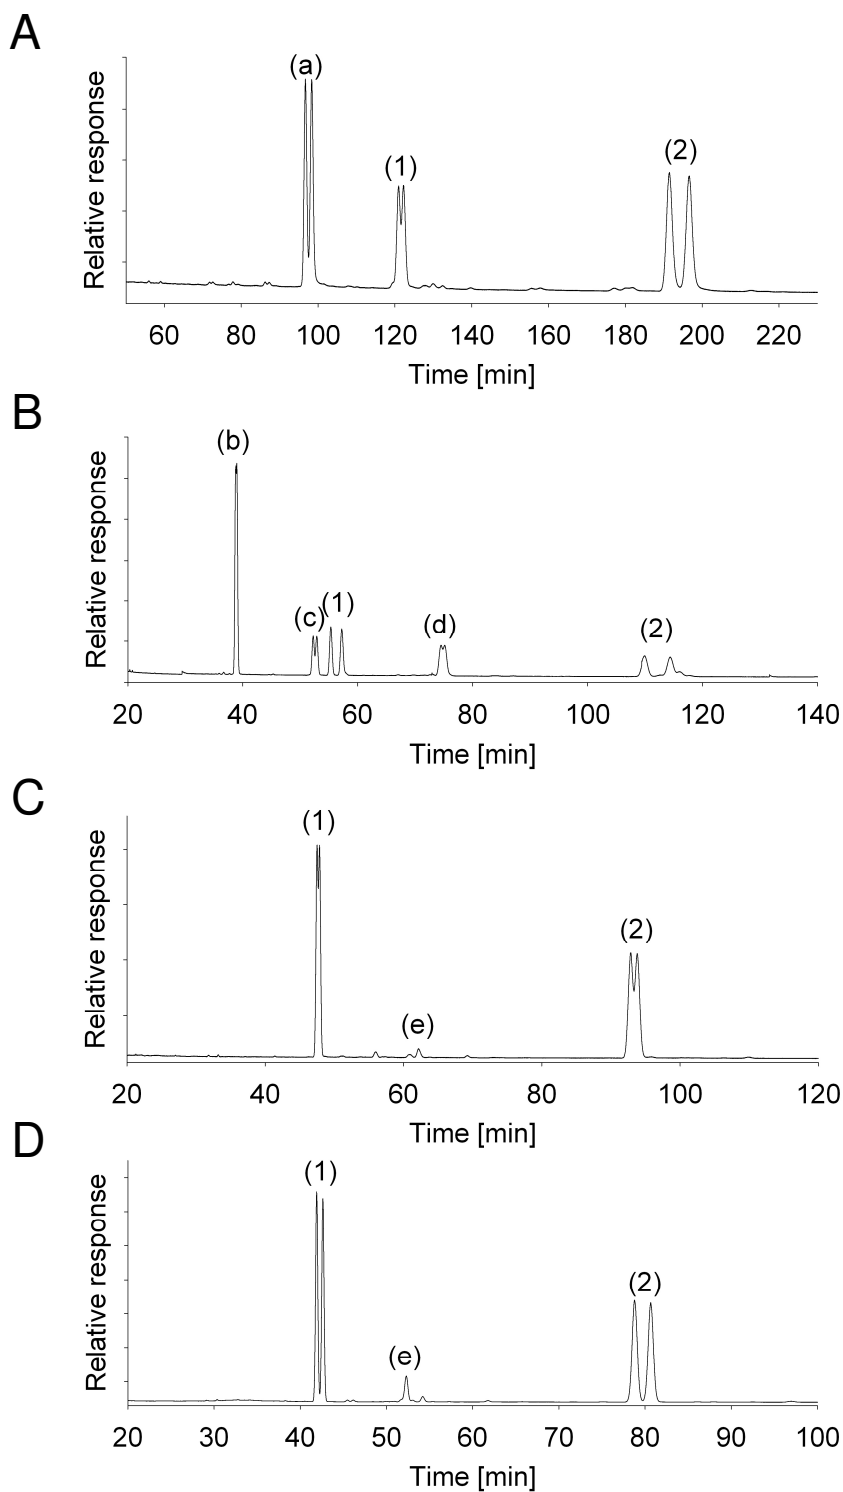

**Figure S3.** The isothermal resolution of 5-91 (1) and 5'-132 (2) on different columns: A. 180°C on BGB column ( $R_{s1} = 0.68$ ;  $R_{s2}=1.0$ ); B. 180°C on BDM column ( $R_{s1} = 1.4$ ;  $R_{s2} = 1.5$ ); C. 180°C on BPM column ( $R_{s1} = 0.46$ ;  $R_{s2} = 0.54$ ); D. 180°C on CD column ( $R_{s1} = 0.75$ ;  $R_{s2} = 0.92$ ). In all cases the flow is 3 mL/min. (a) 5'-132; (b) 3-98; (c) 5-92; (d) 4-136; (e) unknown contamination.

# S4-A

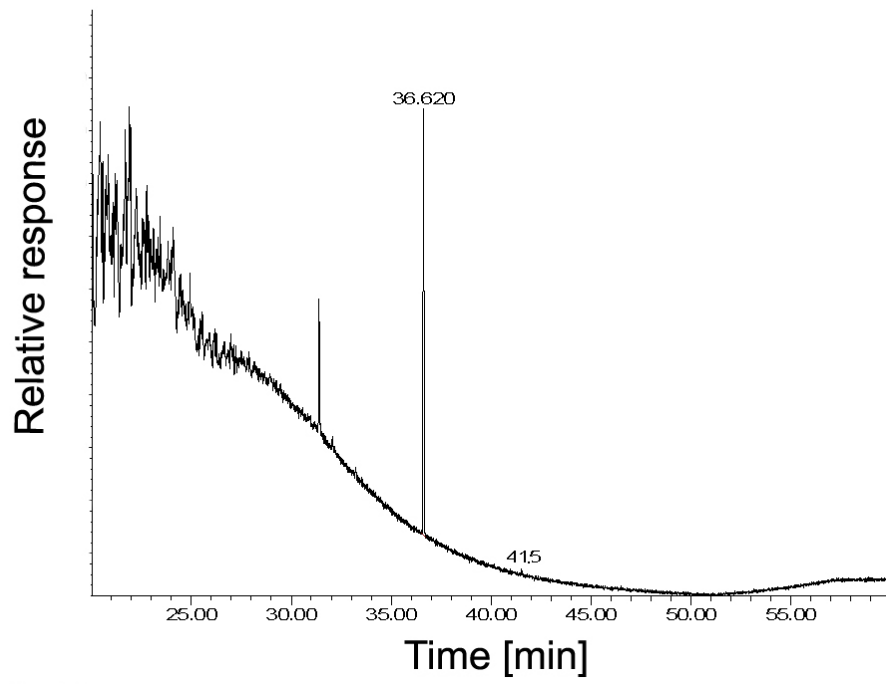

# S4-B

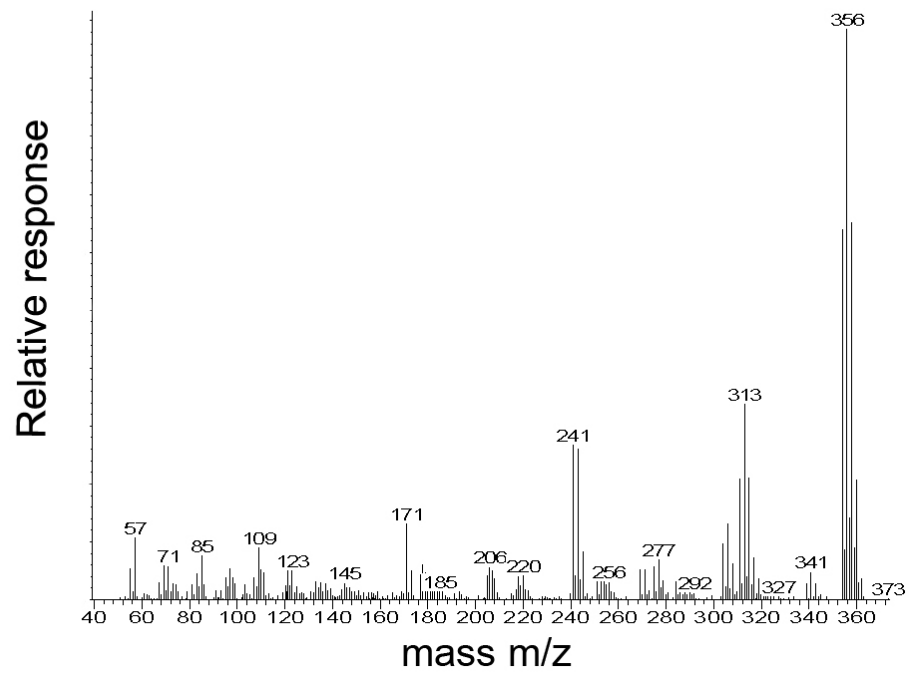

# S4-C

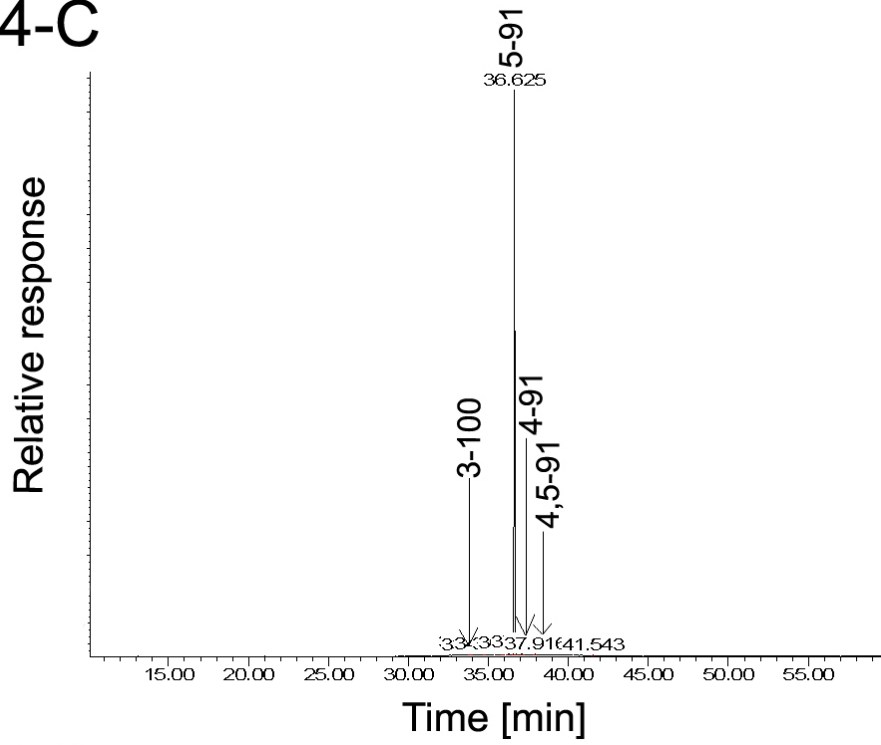

# S4-D

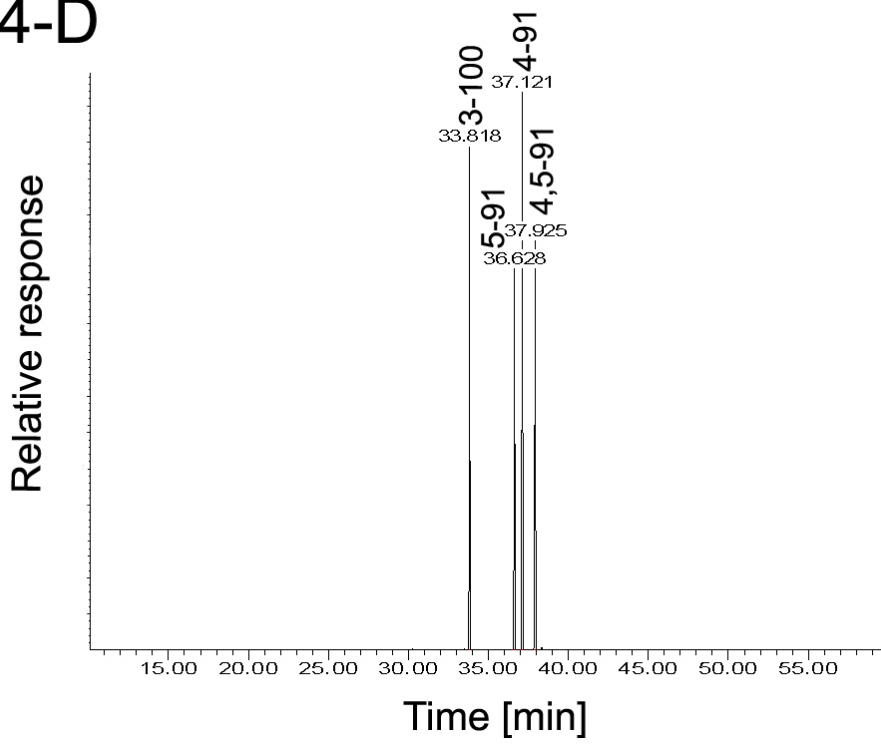

S4-E

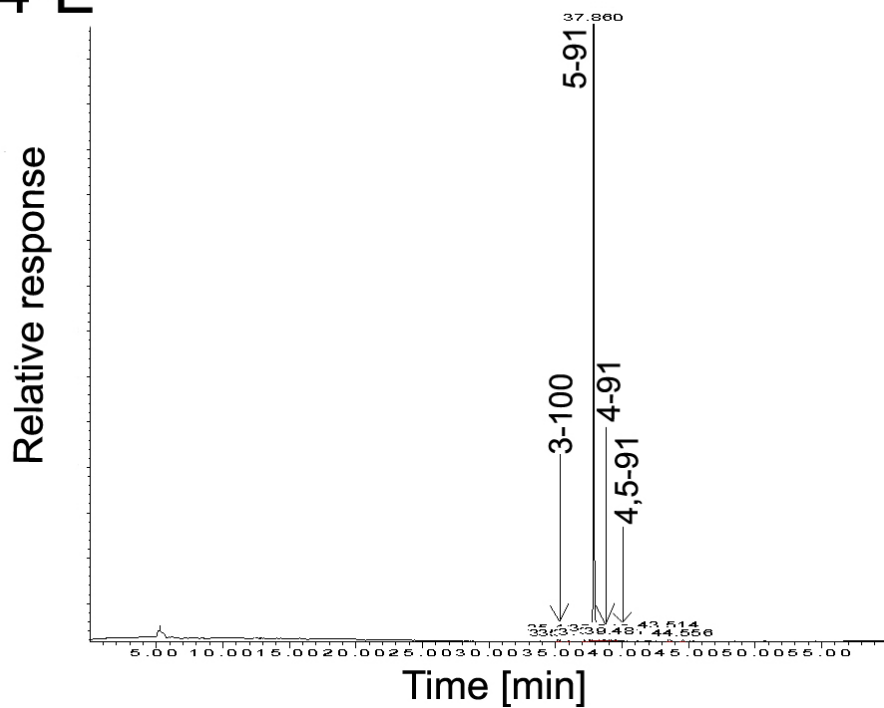

S4-F

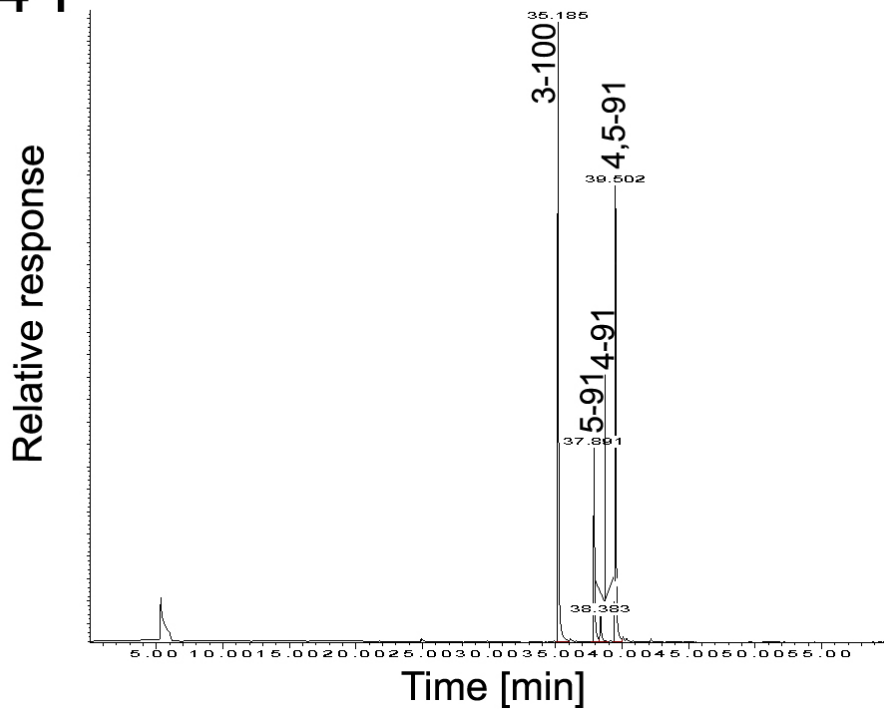



**Figure S4.** Microsomal metabolism of PCB 91 by liver microsomes. One major mono-methoxylated metabolite of PCB 91, corresponding to 5-91, is formed in the microsomal incubation according to GC-MS and GC-ECD analysis. **A-B.** Chromatogram (A) and mass spectrum of major metabolite (B) recorded in the TIC mode. The chromatogram shows a major peak at 36.6 min with a molecular ion corresponding to a mono-methoxylated pentachlorobiphenyl ( $m/z = 356$ ) and a small peak at 41.5 min with a molecular ion of  $m/z = 383$ . **C-D.** Chromatograms of the incubation sample (C) and a standard containing authentic metabolites of PCB 91 (D) recorded in the SIM mode. The chromatogram of the incubation sample shows a single major peak at 36.6 min, corresponding to 5-91. Several minor peaks corresponding to 3-100 (33.8 min), 4-91 (37.1 min) and 4,5-91 (37.9 min) were also detected. The metabolite ratio is 5-91 : 3-100 : 4-91 : 4,5-91 = 1 : 0.004 : 0.003 : 0.002. **E-F.** Chromatograms of the incubation sample (E) and the authentic standard (F) analyzed with GC-ECD. The chromatogram of the incubation sample shows a single major peak at 37.9 min, corresponding to 5-91. Several minor peaks corresponding to 3-100 (35.2 min), 4-91 (38.4 min) and 4,5-91 (39.5 min) were also observed. The metabolite ratio is 5-91 : 3-100 : 4-91 : 4,5-91 = 1 : 0.003 : 0.010 : 0.002.

# S5-A

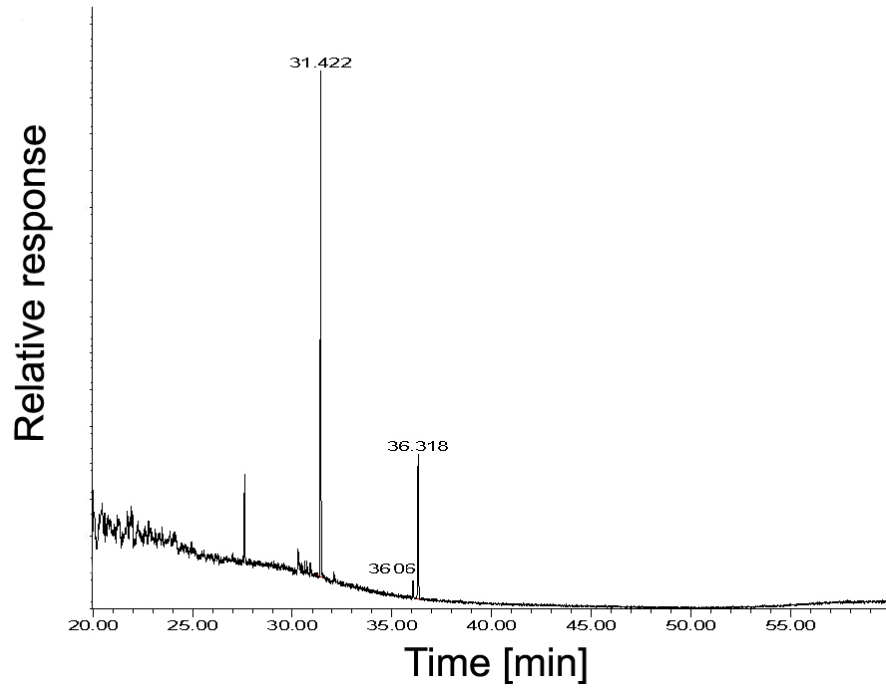

# S5-B

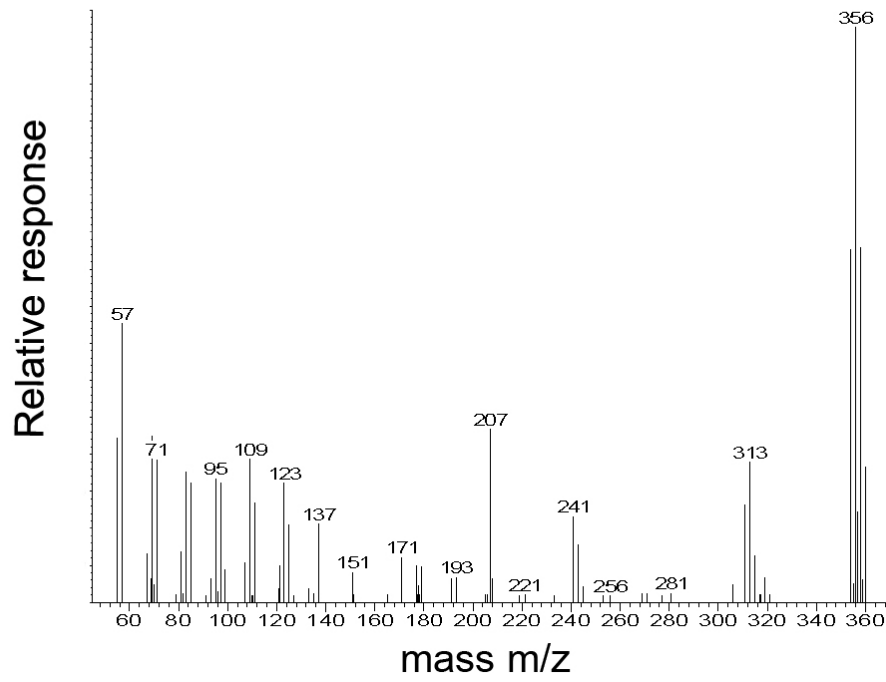

# S5-C

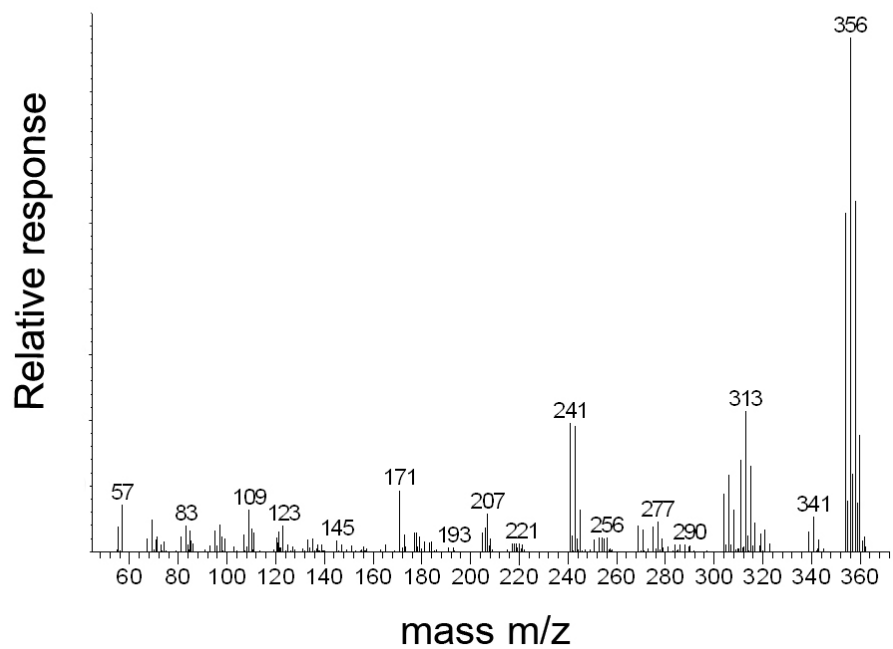

# S5-D

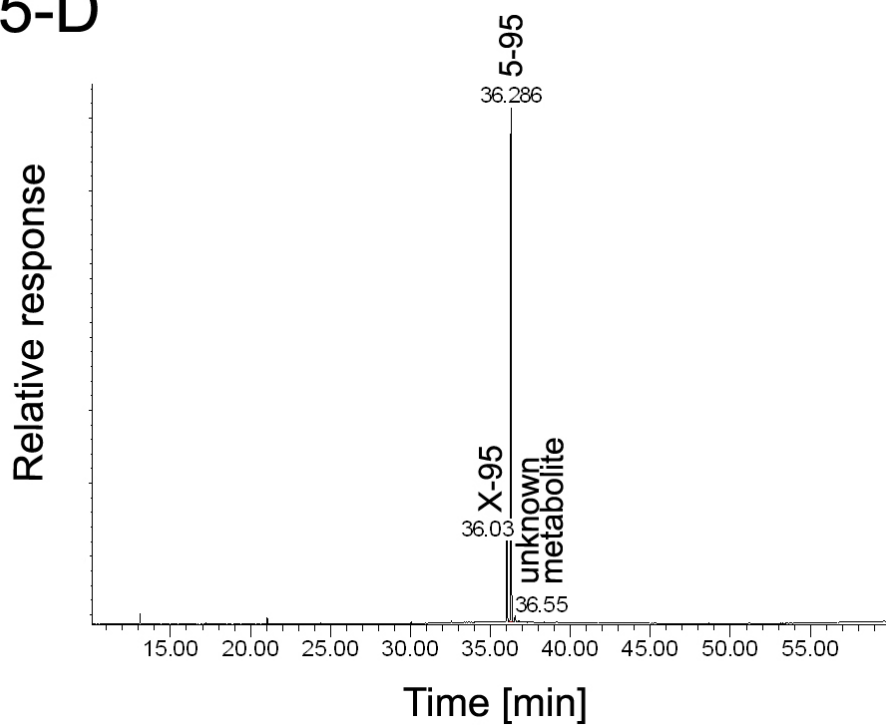

S5-E

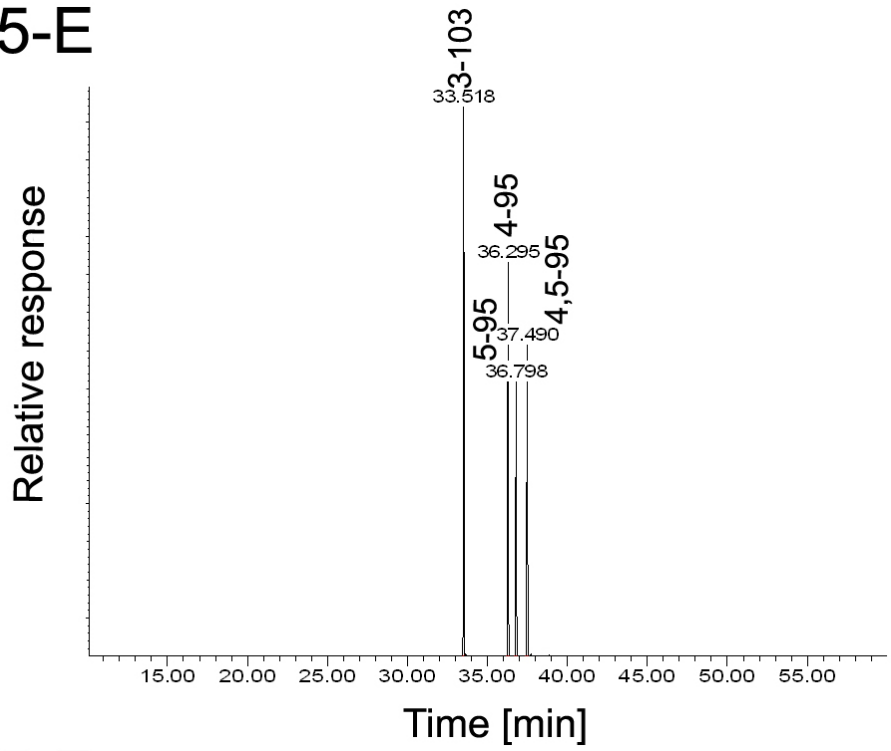

S5-F

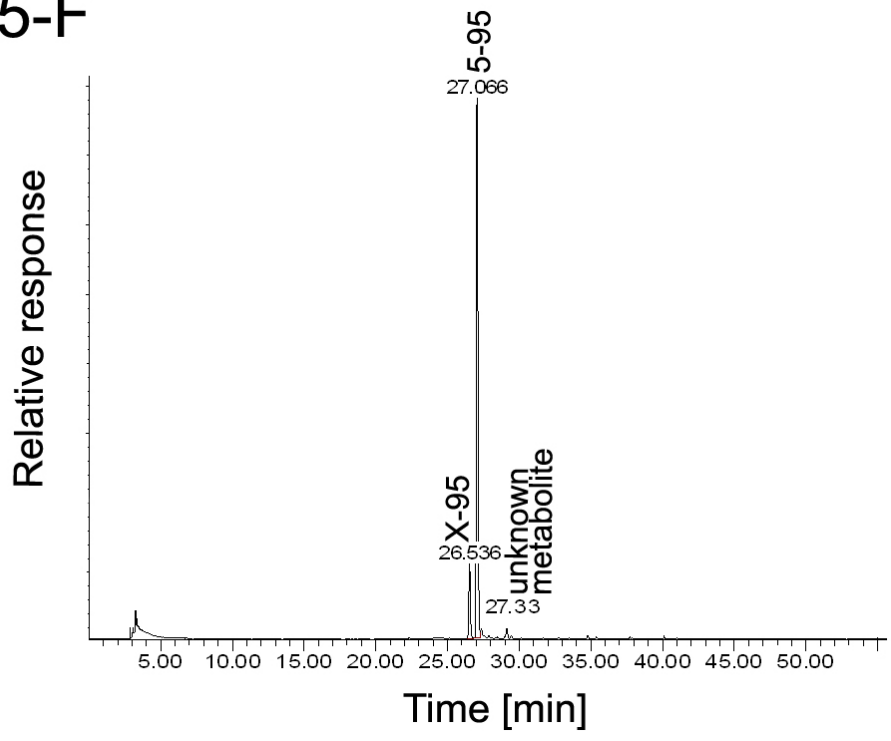

## S5-G

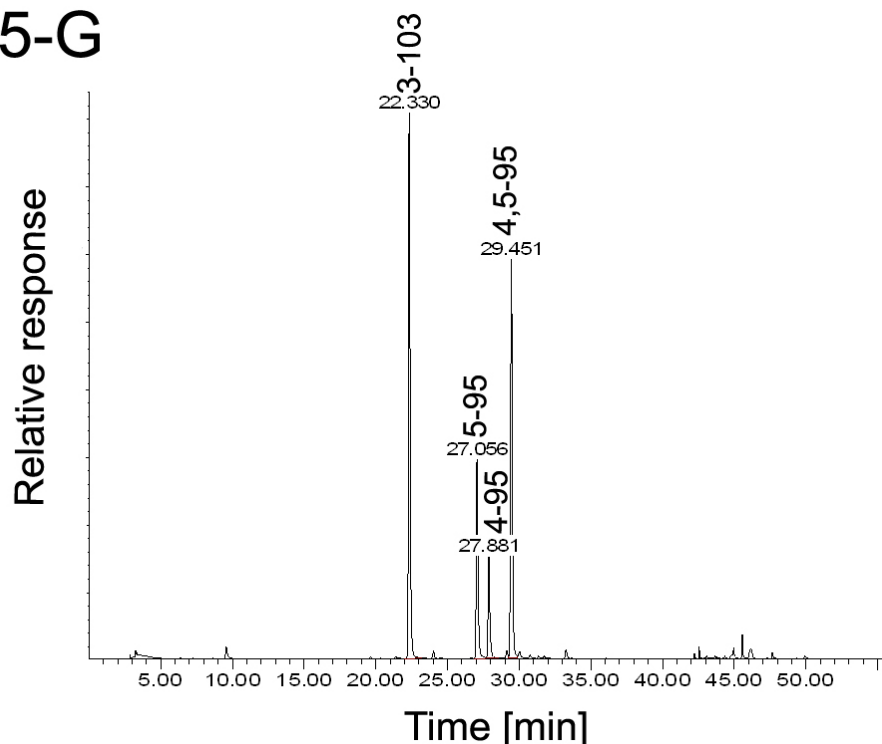

**Figure S5.** Microsomal metabolism of PCB 95 by liver microsomes. Two mono-methoxylated metabolites of PCB 95 are formed according to GC-MS and GC-ECD analysis. One metabolite corresponds to 5-95. The structure of the other mono-methoxylated metabolite, X-95, is unknown. **A-C.** Chromatogram (A) and mass spectra of metabolites (B and C) recorded in the TIC mode. The chromatogram shows a major peak at 36.32 min and minor peak at 36.1 min, with molecular ion at  $m/z$  356, corresponding to mono-methoxylated pentachlorobiphenyls. **D-E.** Chromatograms of the incubation sample (D) and a standard containing authentic metabolites of PCB 95 (E) recorded in the SIM mode. The chromatogram of the incubation sample shows a major peak at 36.3 min, corresponding to 5-95, and a peak at 36.0 min, corresponding to an unknown mono-methoxylated metabolite X-95. **F-G.** Chromatograms of the incubation sample (F) and the authentic standard (G) analyzed with GC-ECD. The chromatogram of the incubation sample shows a major peak at 27.1 min, corresponding to 5-95, and a peak at 26.5 min, corresponding to the unknown mono-methoxylated metabolite X-95.

S6-A

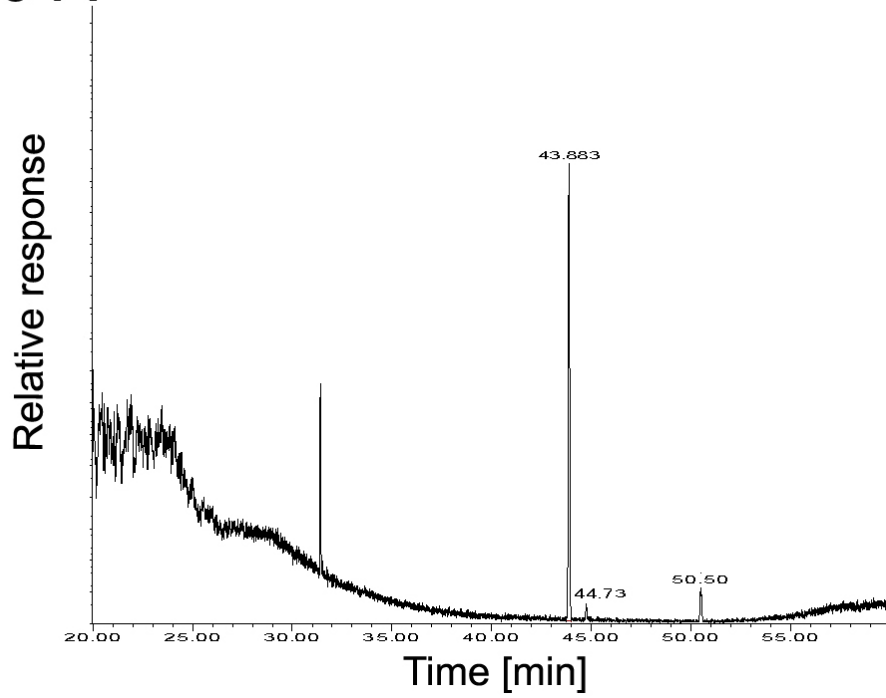

S6-B

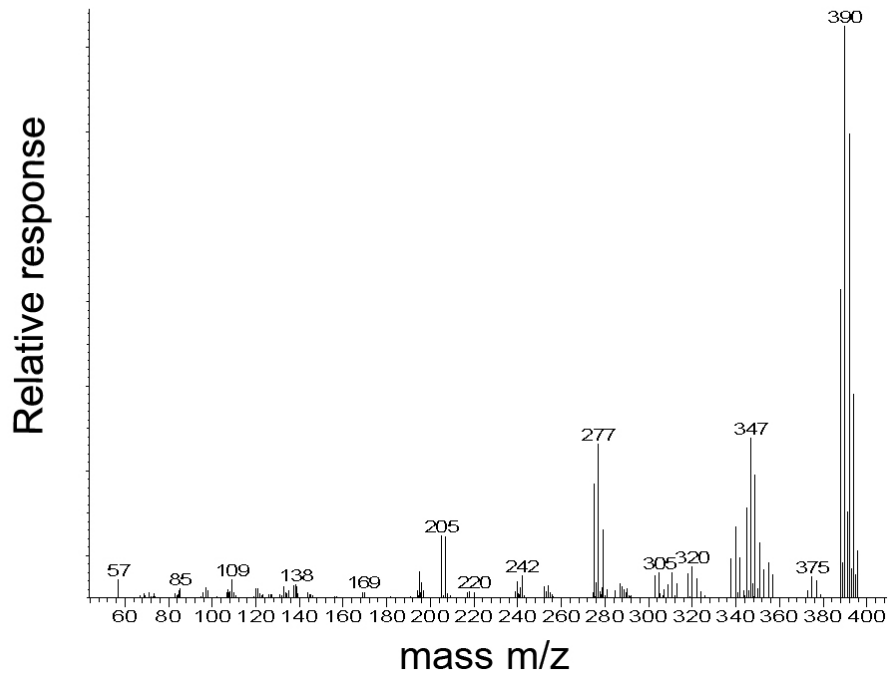

# S6-C

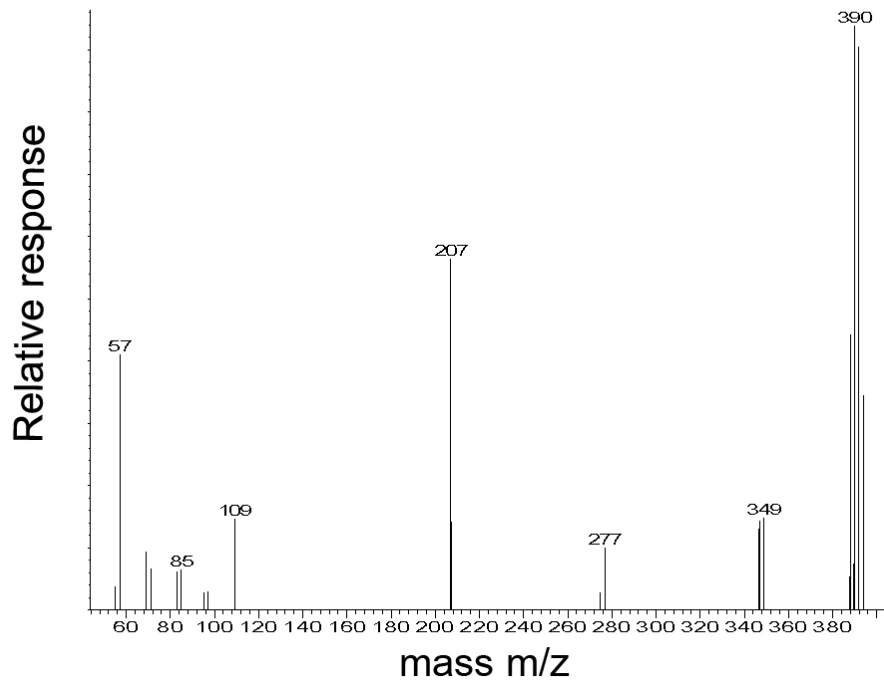

# S6-D

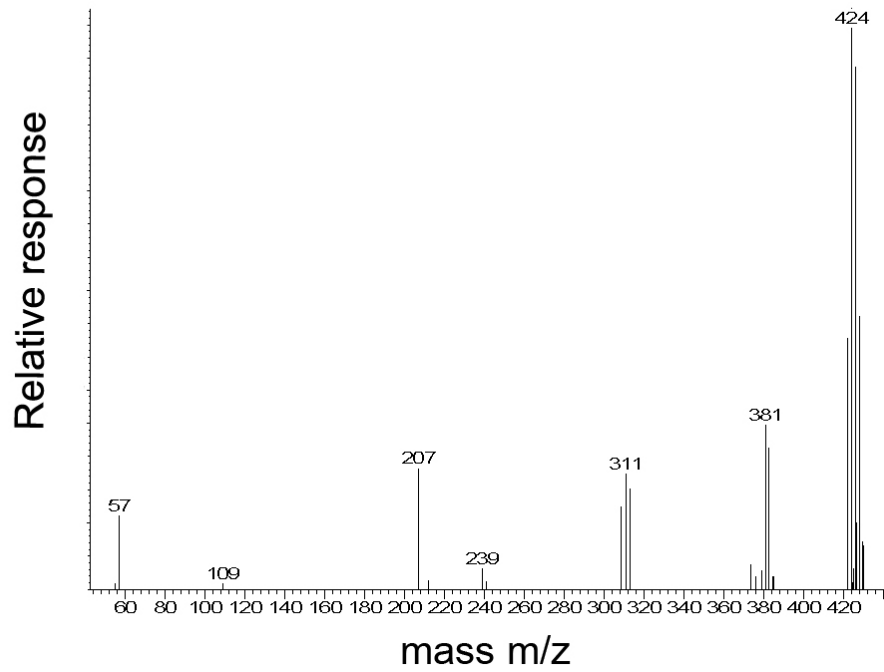

S6-F

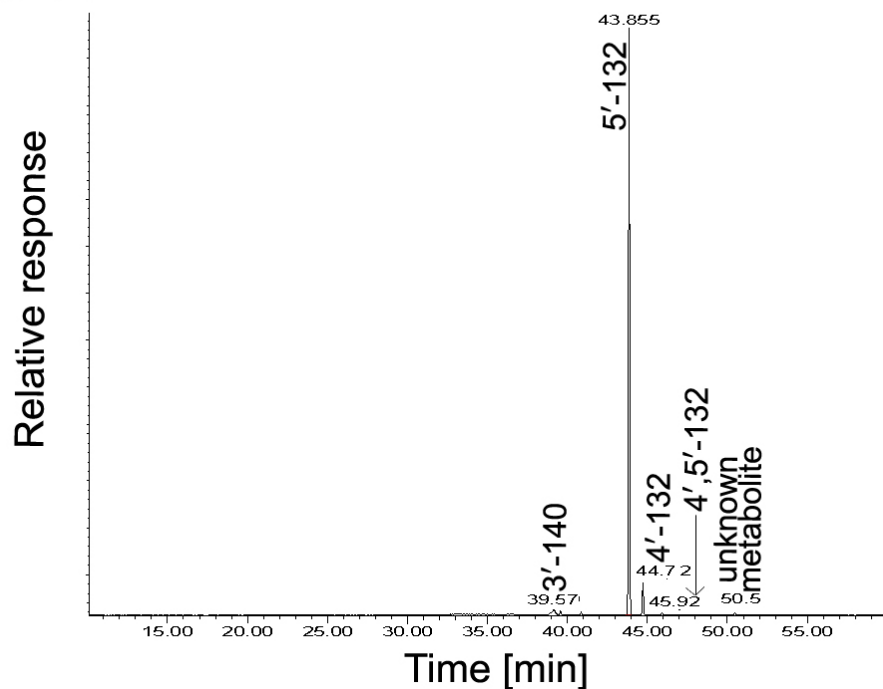

S6-F

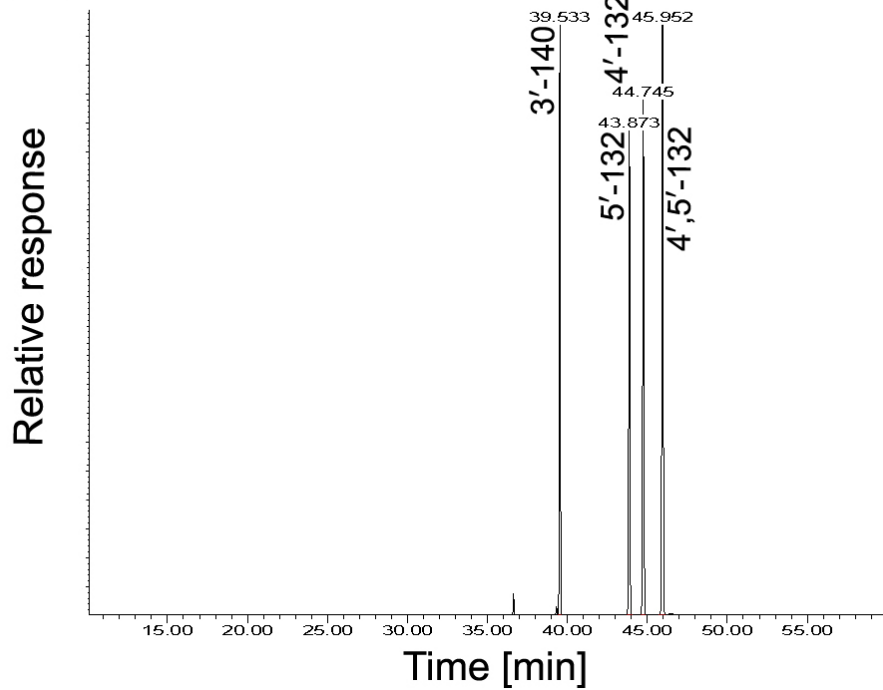



S6-G

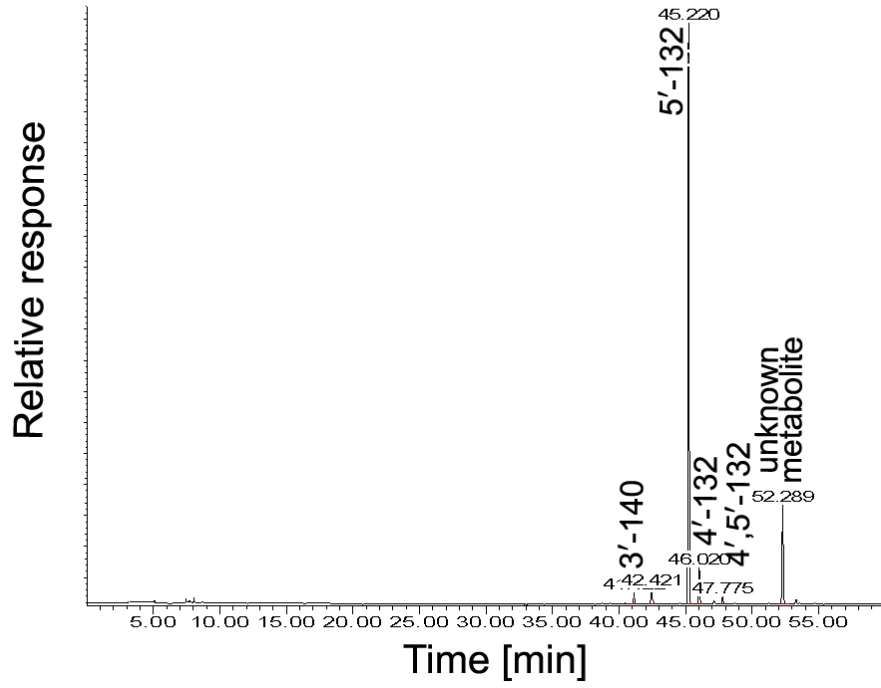

S6-H

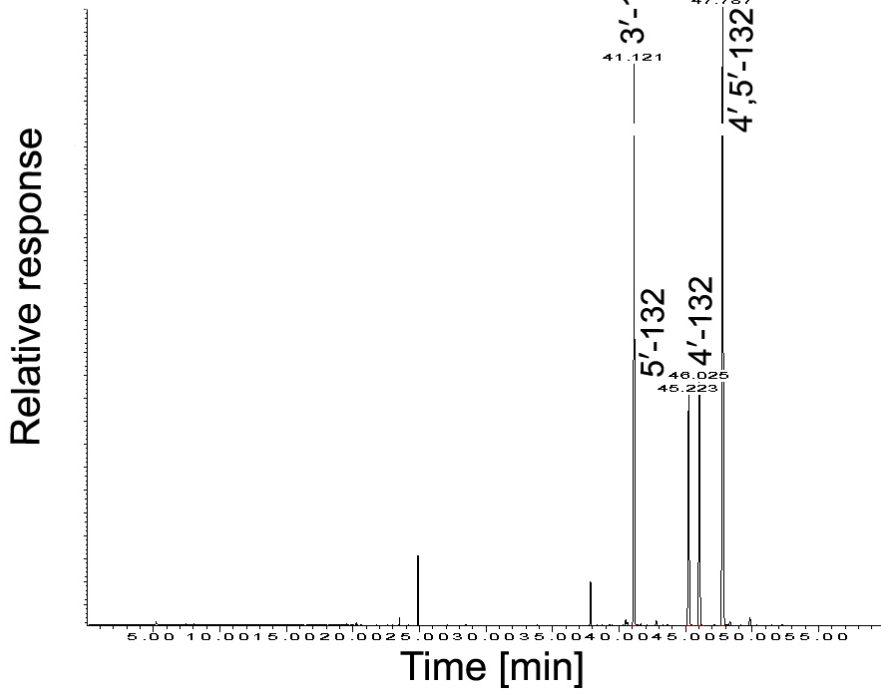

**Figure S6.** Microsomal metabolism of PCB 132 by liver microsomes. Four metabolites of PCB 132, including 5'-132, 3'-140, 4'-132 and 4',5'-132, are formed in the microsomal incubation according to GC-MS and GC-ECD analysis. **A-D.** Chromatogram (A) and mass spectra of metabolites (B-D) recorded in the TIC mode. The chromatogram shows a major peak at 43.9 min corresponding to a mono-methoxylated hexachlorobiphenyl ( $m/z$  390), a minor peak of a mono-methoxylated hexachlorobiphenyl ( $m/z$  390) at 44.7 min, and a peak at 50.5 min with a molecular ion at  $m/z$  424 corresponding to a di-methoxylated hexachlorobiphenyl. **E-F.** Chromatograms of the incubation sample (E) and a standard containing authentic metabolites of PCB 132 (F) recorded in the SIM mode. The chromatogram of the incubation sample shows a major peak at 43.9 min, corresponding to 5'-132. Several minor peaks corresponding to 3'-140 (39.6 min), 4'-132 (44.7 min) and 4',5'-132 (45.9 min) were also detected. The metabolite ratio is 5'-132 : 3'-140 : 4'-132 : 4',5'-132 = 1 : 0.1 : 0.06 : 0.005. **G-H.** Chromatograms of the incubation sample (G) and the authentic standard (H) analyzed with GC-ECD. The chromatogram of the incubation shows a major peak at 45.2 min, corresponding to 5'-132. Several minor peaks corresponding to 3'-140 (41.1 min), 4'-132 (46.0 min) and 4',5'-132 (47.8 min) were also detected. The metabolite ratio is 5'-132 : 3'-140 : 4'-132 : 4',5'-132 = 1 : 0.01 : 0.06 : 0.002.

# S7-A

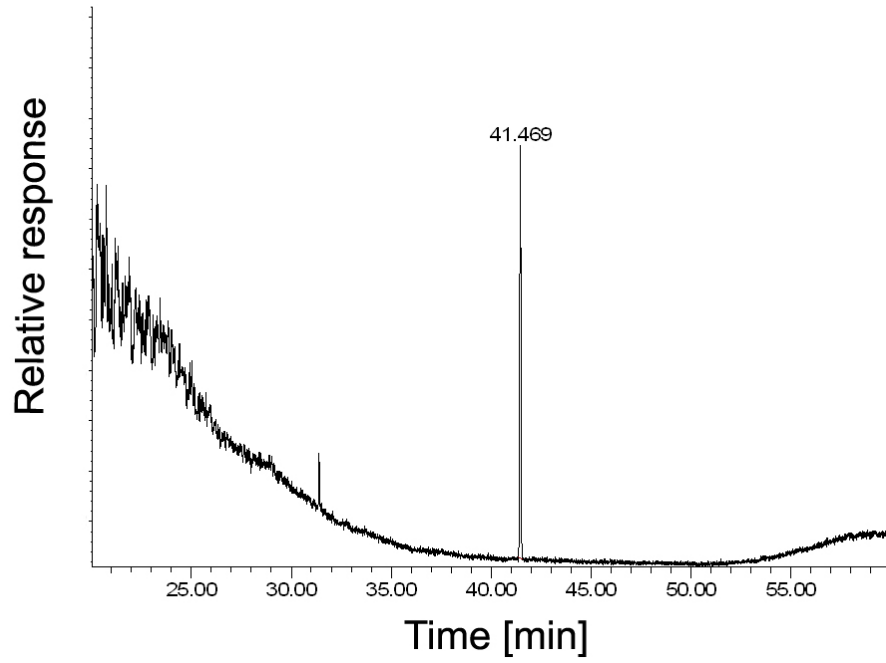

# S7-B

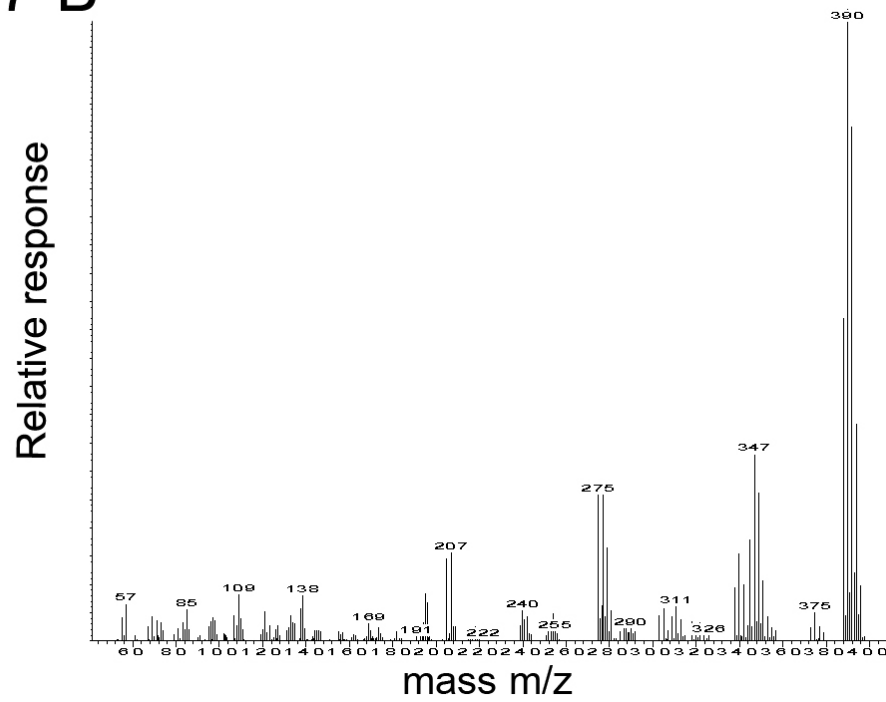

S7-C

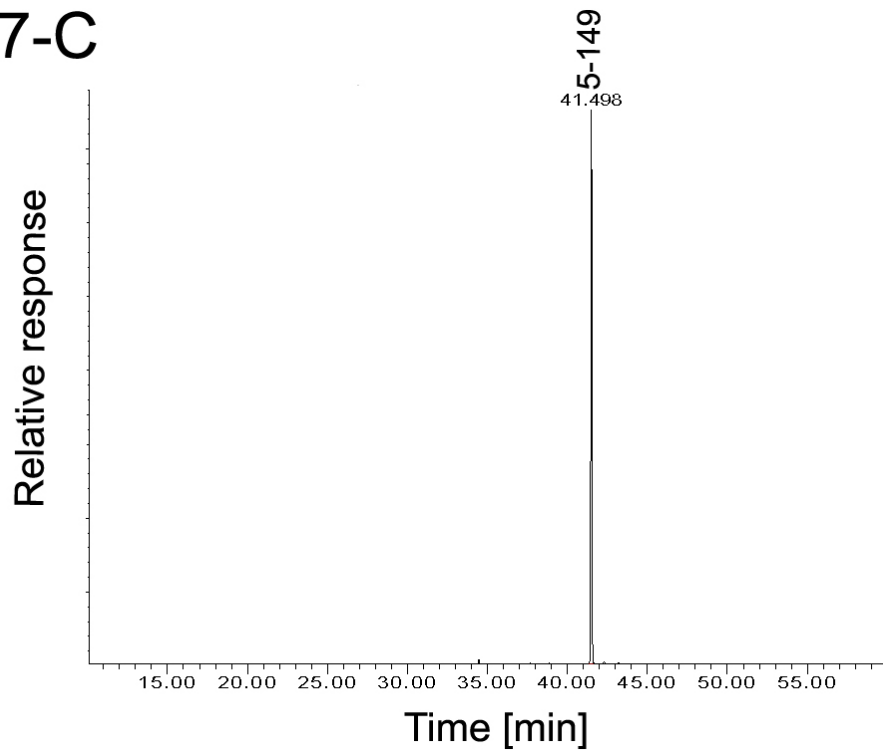

S7-D

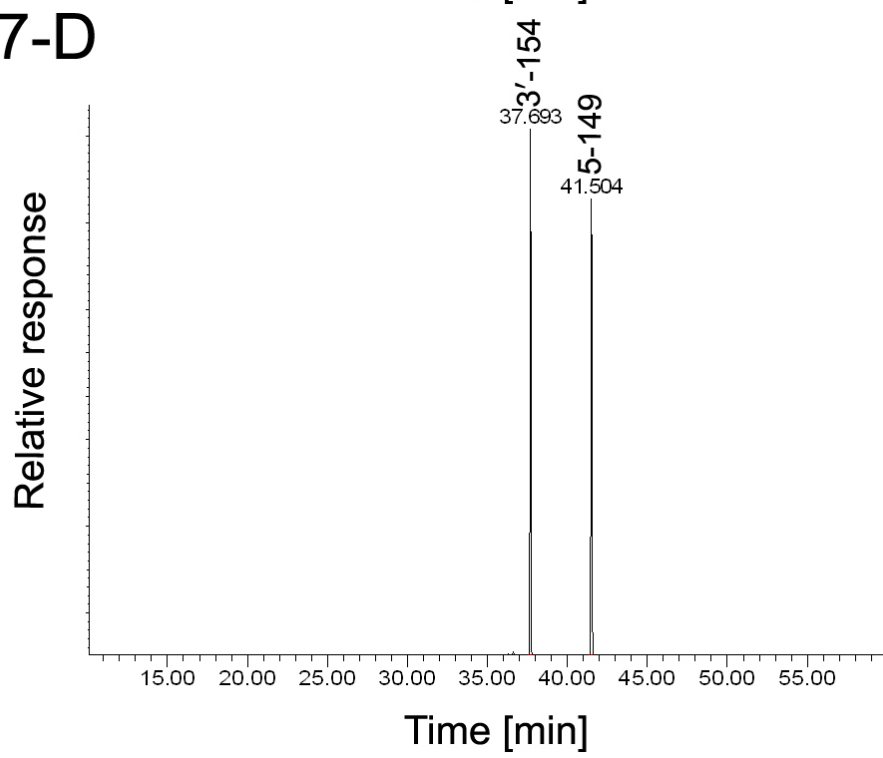

S7-E

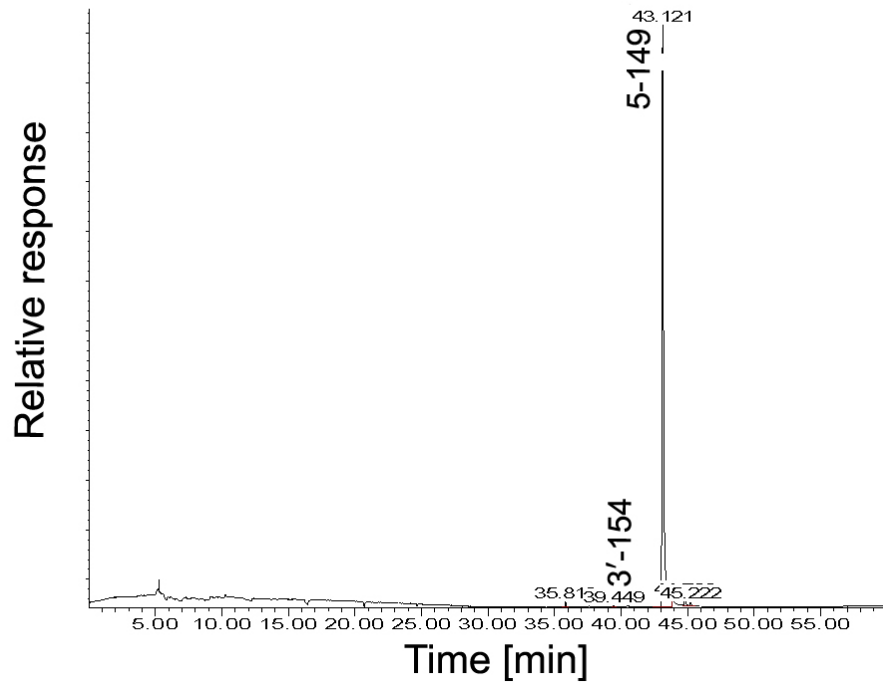

S7-F

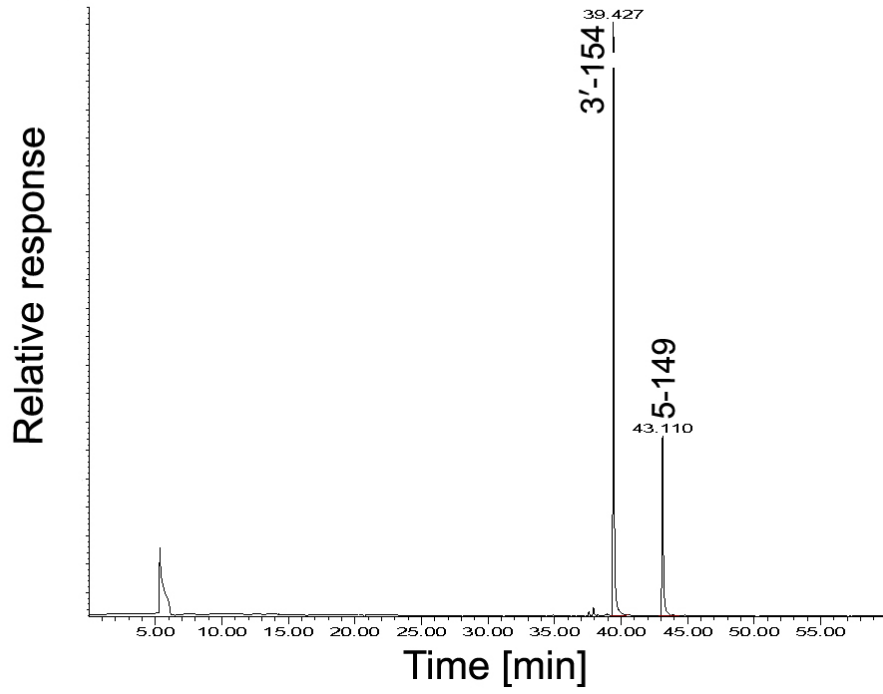

**Figure S7.** Microsomal metabolism of PCB 149 by liver microsomes. One major mono-methoxylated metabolite of PCB 149, corresponding to 5-149, is formed in microsomal incubation according to GC-MS and GC-ECD analysis. **A-B.** Chromatogram (A) and mass spectrum of the major metabolite (B) recorded in the TIC mode. The chromatogram shows a major peak at 41.5 min with a molecular ion corresponding to a mono-methoxylated hexachlorobiphenyl ( $m/z = 390$ ). **C-D.** Chromatograms of the incubation sample (C) and a standard containing authentic metabolites of PCB 149 (D) recorded in the SIM mode. The chromatogram of the incubation sample shows a single major peak at 41.5 min, corresponding to 5-149. **E-F.** Chromatograms of the incubation sample (E) and a standard containing authentic metabolites of PCB 149 (F) analyzed with GC-ECD. Chromatogram of the incubation sample shows a single major peak at 43.1 min, corresponding to 5-149, and a minor peak at 39.4 min, corresponding to 3-154. The metabolite ratio is 5-149 : 3-154 = 1: 0.001.

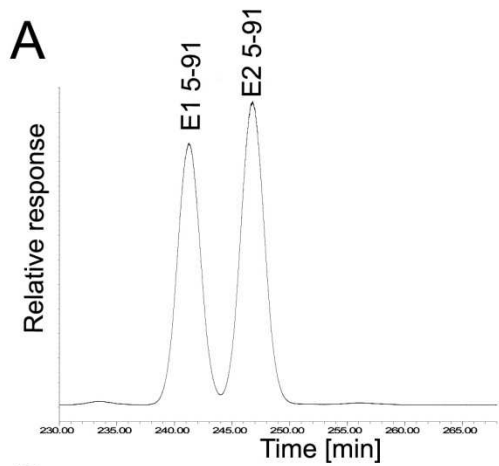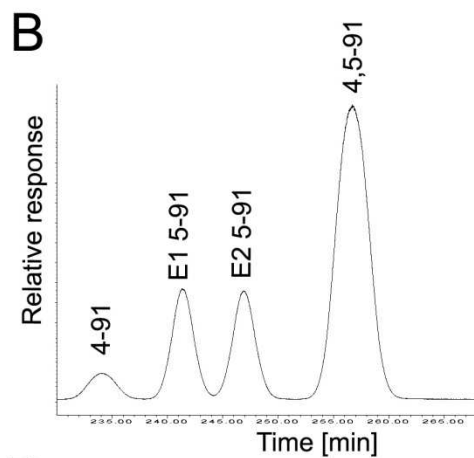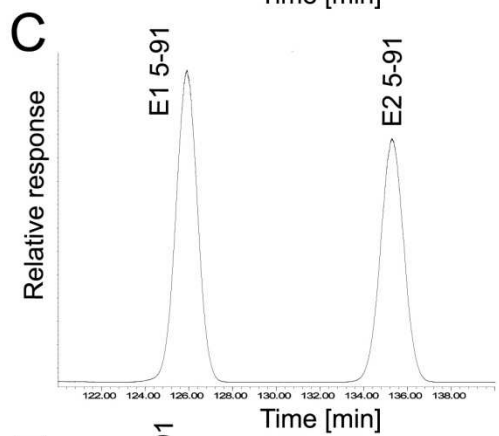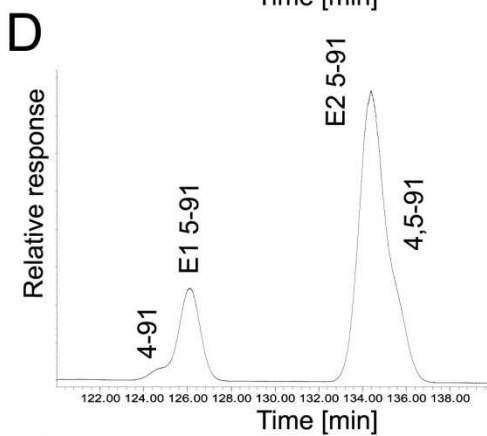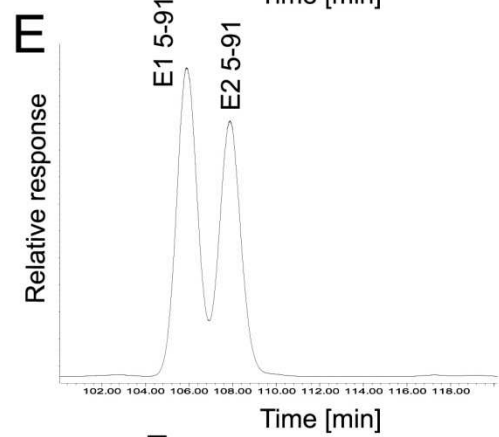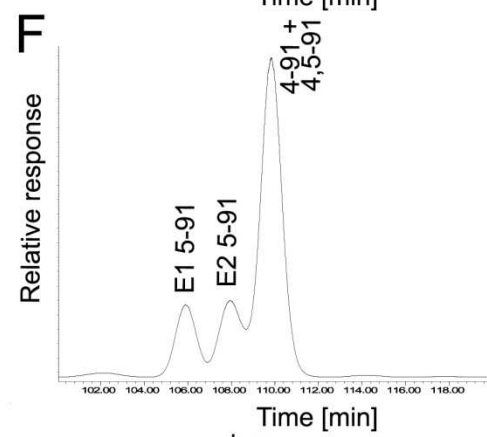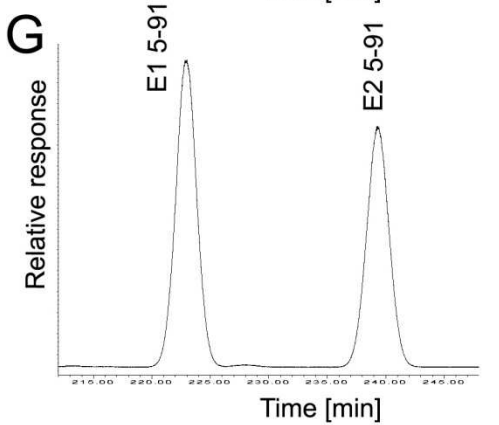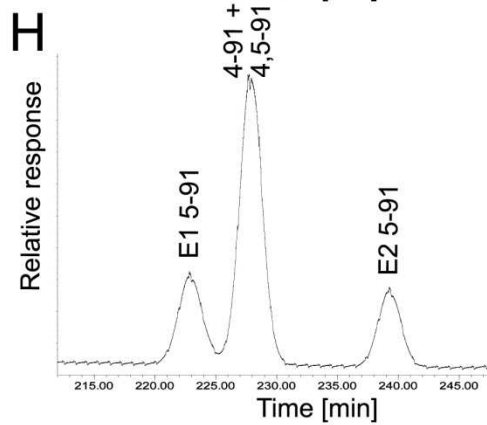

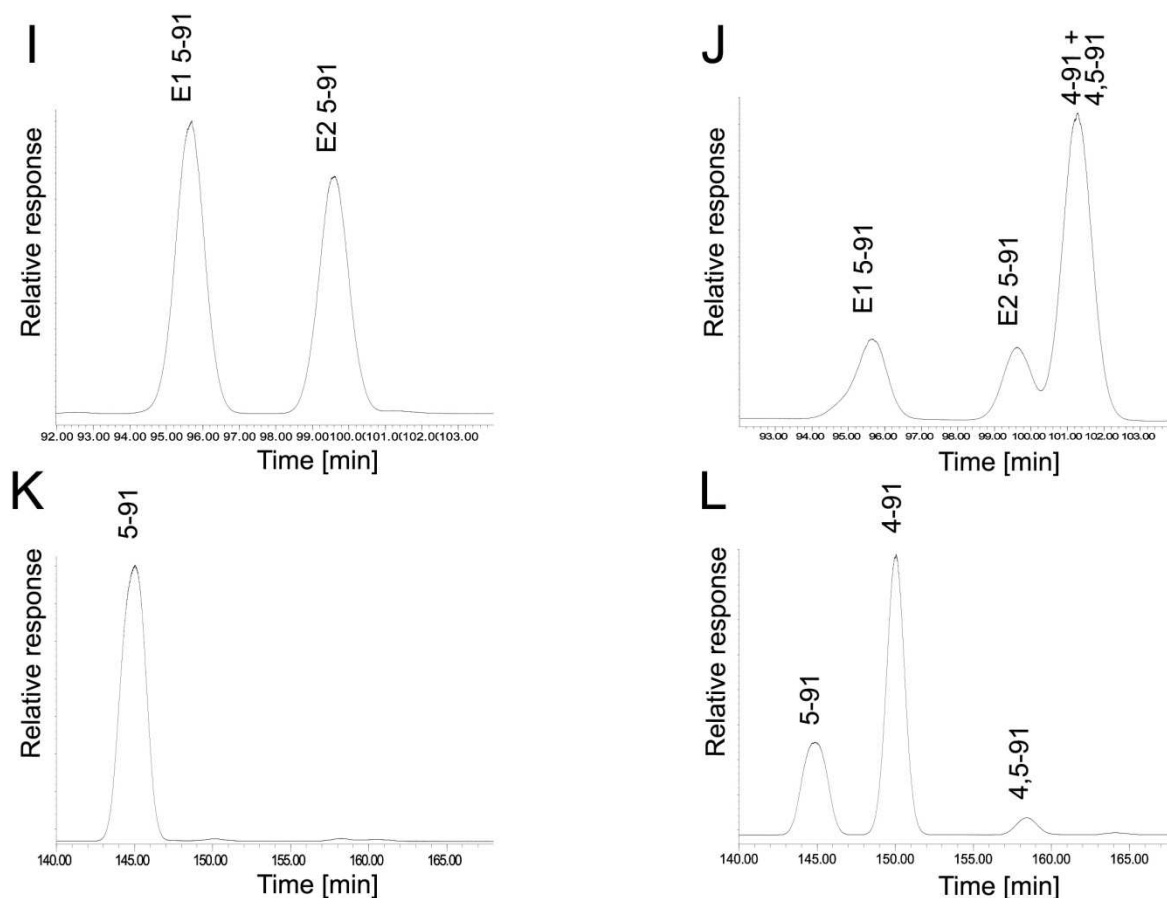

**Figure S8.** Enantiomeric enrichment of 5-91 isolated from an incubation of PCB 91 with liver microsomes. The diazomethane derivatized metabolite extract was analyzed on different enantioselective columns (left column) and compared to the corresponding metabolite standards (right column). **A.** incubation, BGB column, EF = 0.46. **B.** racemic standard, BGB column, EF = 0.50. **C.** incubation, BDM column, EF = 0.54. **D.** racemic standard, BDM column, no EF was determined because of co-elution of the second peak of 5-91 with 4,5-91. **E.** incubation, BPM column, EF = 0.54. **F.** racemic standard, BPM column, no EF was determined because the second eluting peak of 5-91 overlaps with 4- and 4,5-91. **G.** incubation, CB column, EF = 0.54. **H.** racemic standard, CB column, EF = 0.54. **I.** incubation, CD column, EF = 0.54. **J.** racemic standard, CD column, no EF was determined because first eluting peak of 5-91 co-elutes with 4-91 and the second eluting peak co-elutes with 4,5-91. **K.** incubation, GTA column, atropisomers of 5-91 are not resolved. **L.** racemic standard,



GTA column, metabolites of PCB 91 are not resolved. Note the reverse of the elution order of the atropisomers on the BGB column (A) compared to BDM (C), BPM (E), CB (G) and CD columns (I). Abbreviations of columns: BGB - BGB-172; BDM - Chiral-Dex B-DM, BPM - Chiral-Dex B-PM; CB - Cyclosil-B; CD - Chirasil-Dex (CD); GTA - Chiral-Dex G-TA. See Table S3 for additional information.

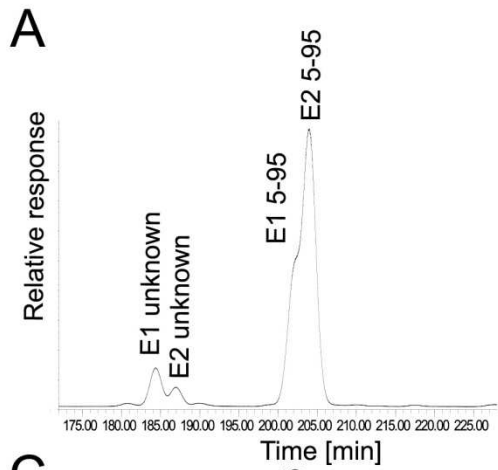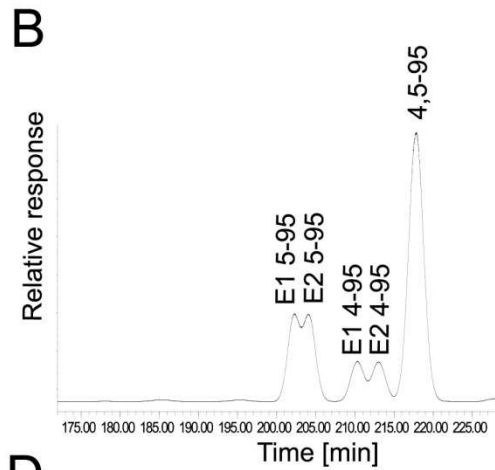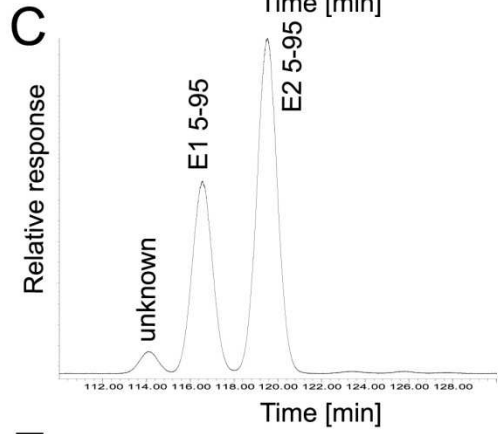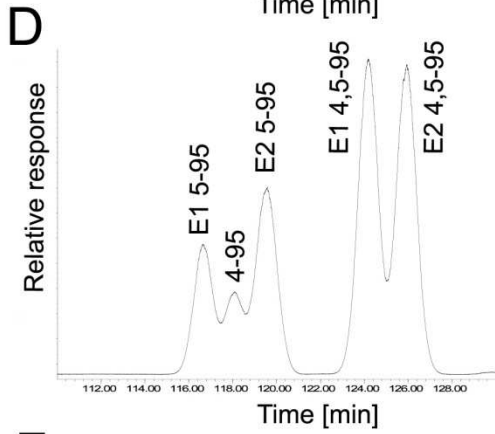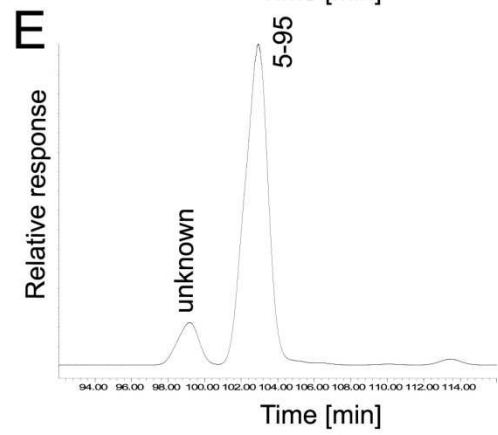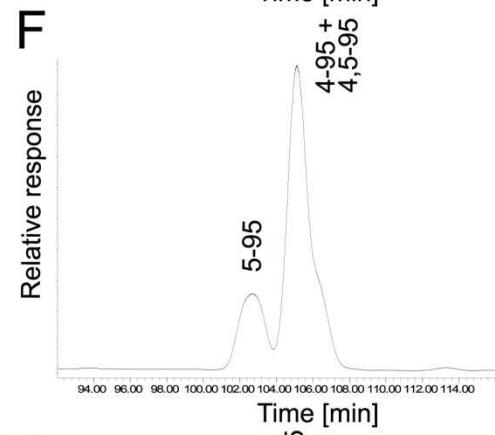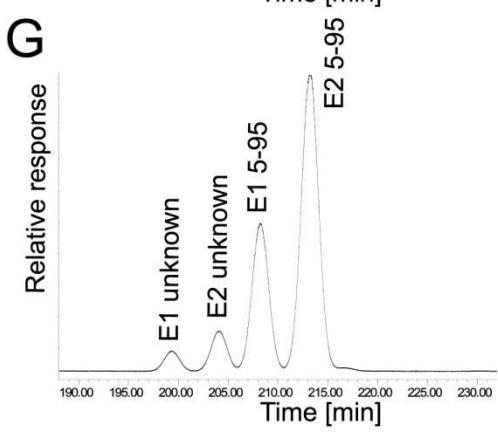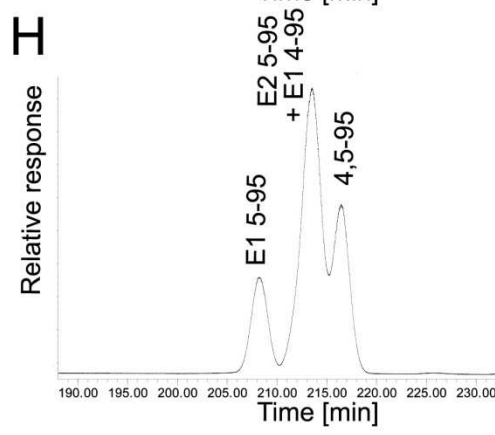

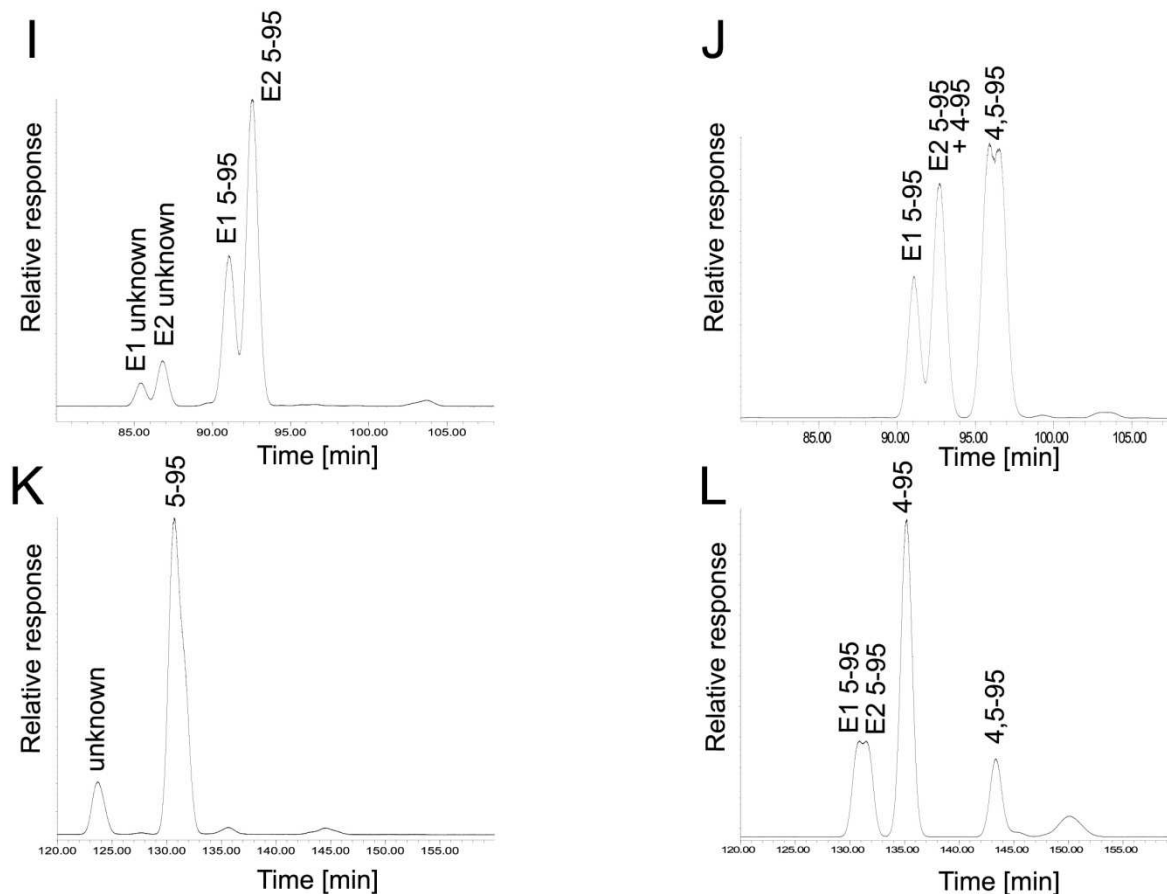

**Figure S9.** Enantiomeric enrichment of 5-95 and X-95 isolated from an incubation of PCB 95 with liver microsomes. The diazomethane derivatized metabolite extract was analyzed on different enantioselective columns (left column) and compared to the corresponding metabolite standards (right column). **A.** incubation, BGB column, resolution is not sufficient to determine EF of 5-95. X-95 EF = 0.68. **B.** racemic standard, BGB column, resolution is not sufficient to determine EF of 5-95. **C.** incubation, BDM column, 5-95 EF = 0.36. **D.** racemic standard, BDM column, no EF was determined because of co-elution of both peaks of 5-95 with 4-95. **E.** incubation, BPM column, atropisomers of 5-95 are not resolved. **F.** racemic standard, BPM column, metabolites of PCB 95 are not resolved. **G.** incubation, CB column, 5-95 EF = 0.32 and X-95 EF = 0.33. **H.** racemic standard, CB column, no EF was determined because of co-elution of second atropisomer of 5-95 with 4-95. **I.** incubation, CD column, 5-95 EF = 0.33. X-95 EF = 0.33. **J.** racemic standard, CD column, no EF was determined

because the second eluting peak of 5-95 co-elutes with 4-95. **K.** incubation, GTA column, resolution is not sufficient to determine EF; however, the first eluting atropisomer appears to be enriched. **L.** racemic standard, GTA column, resolution is not sufficient to determine EF. Abbreviations of columns: BGB - BGB-172; BDM - Chiral-Dex B-DM, BPM - Chiral-Dex B-PM; CB - Cyclosil-B; CD - Chirasil-Dex (CD); GTA - Chiral-Dex G-TA. See Table S3 for additional information.

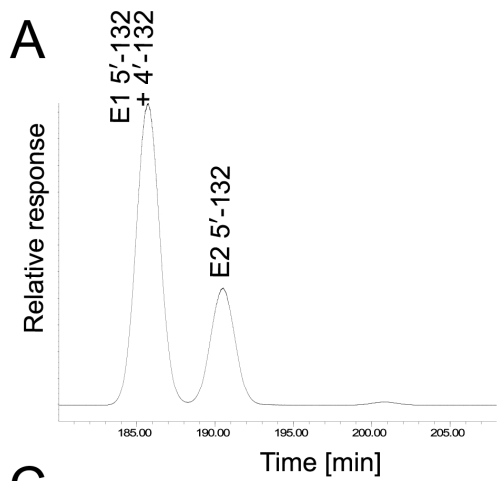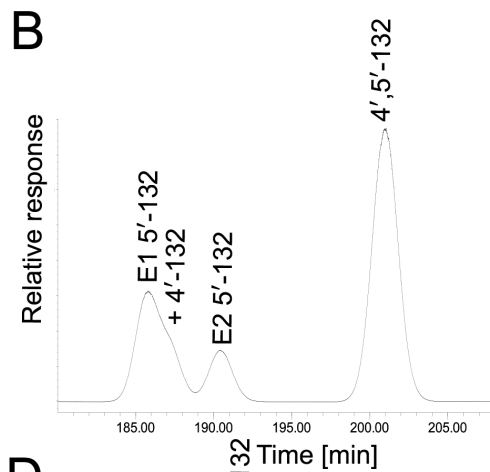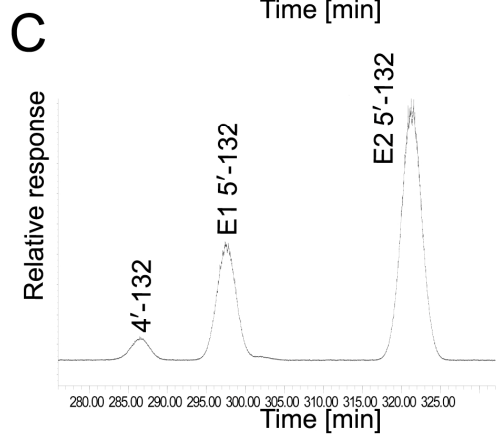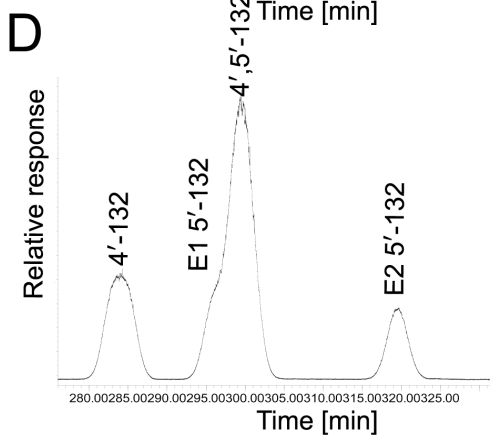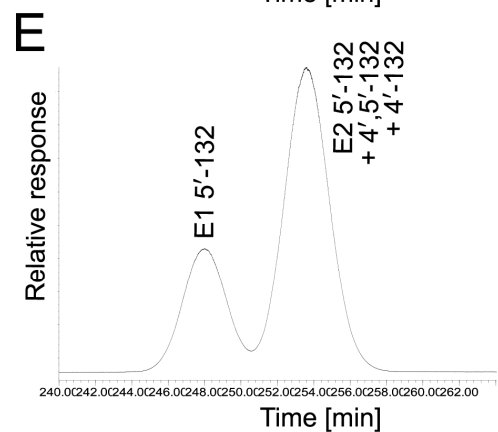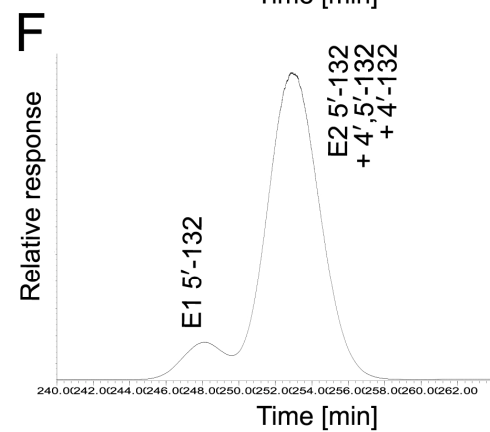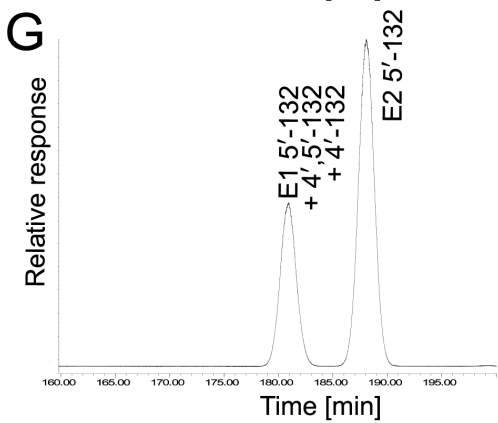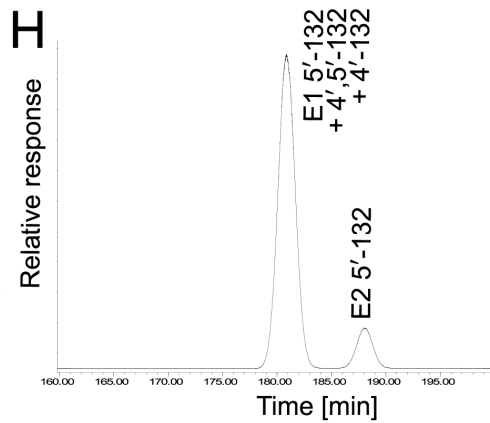

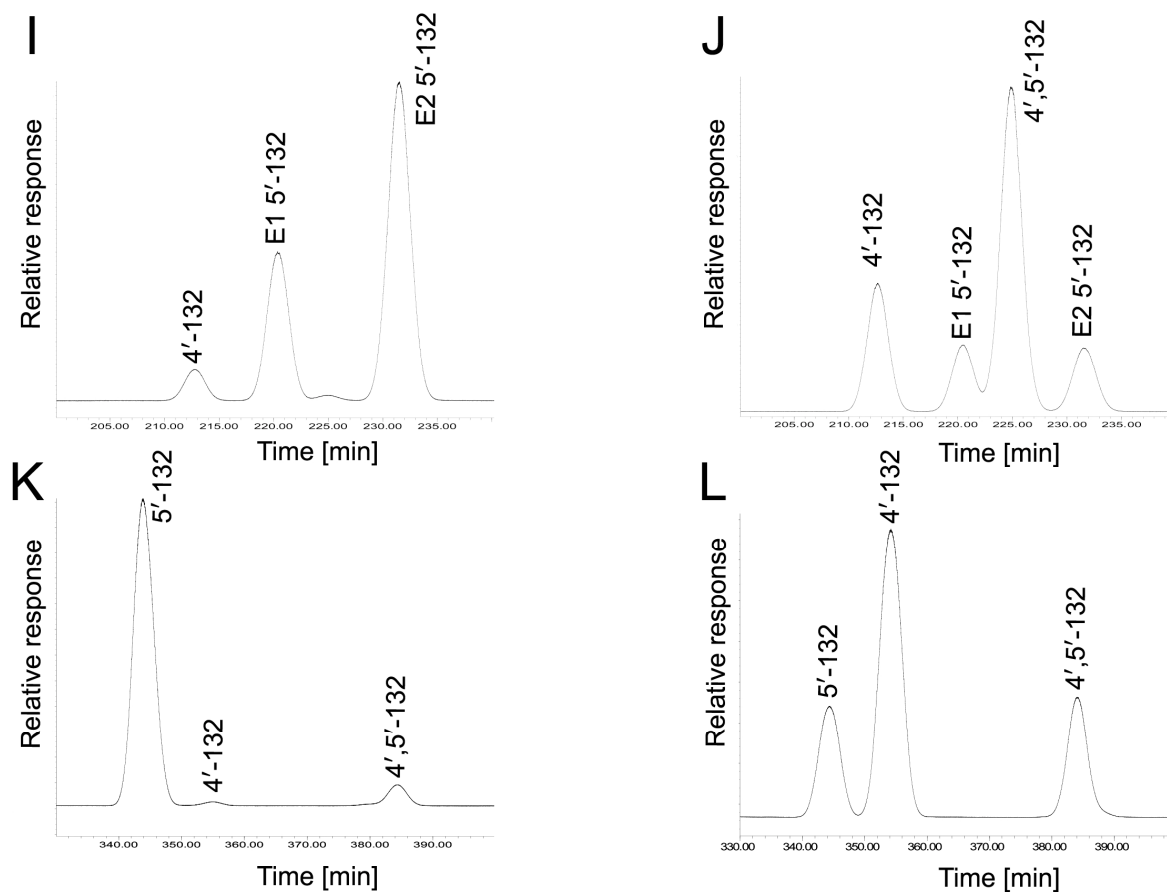

**Figure S10.** Enantiomeric enrichment of 5'-132 isolated from an incubation of PCB 132 with liver microsomes. The diazomethane derivatized metabolite extract was analyzed on different enantioselective columns (left column) and compared to the corresponding metabolite standards (right column). **A.** incubation, BGB column, EF = 0.71. First eluting peak of 5'-132 co-elutes with 4'-132. **B.** racemic standard, BGB column, no EF was determined because of co-elution of the first eluting peak of 5'-132 with 4'-132. **C.** incubation, BDM column, EF = 0.30. **D.** racemic standard, BDM column, no EF was determined because of co-elution of first eluting peak of 5'-132 with 4',5'-132. **E.** incubation, BPM column, EF = 0.28. Second eluting atropisomer of 5'-132 co-elutes with 4'- and 4',5'-132. **F.** racemic standard, BPM column, no EF was determined because the second eluting atropisomer of 5'-132 co-elutes with 4'- and 4',5'-132. **G.** incubation, CB column, EF = 0.31. First eluting peak of 5'-132 co-elutes with 4'- and 4',5'-132. **H.** racemic standard, CB column, no EF was determined because the first eluting peak of 5'-132 co-elutes with 4'- and 4',5'-132. **I.** incubation, CD column, EF = 0.31. **J.** racemic

standard, CD column, EF = 0.50. **K.** incubation, GTA column, the atropisomers of 5'-132 are not resolved. **L.** racemic standard, GTA column, methoxylated metabolites of PCB 132 are not resolved. Note the reverse of the elution order of the atropisomers on the BGB column (A) compared to BDM (C), BPM (E), CB (G) and CD columns (I). Abbreviations of columns: BGB - BGB-172; BDM - Chiral-Dex B-DM, BPM - Chiral-Dex B-PM; CB - Cyclosil-B; CD - Chirasil-Dex (CD); GTA - Chiral-Dex G-TA. See Table S3 for additional information.

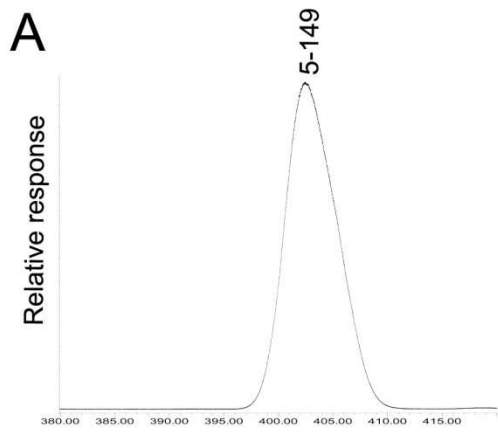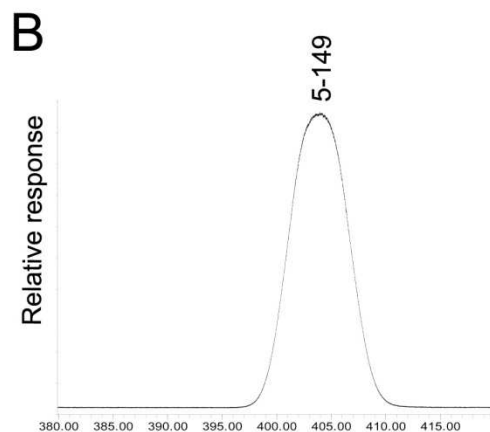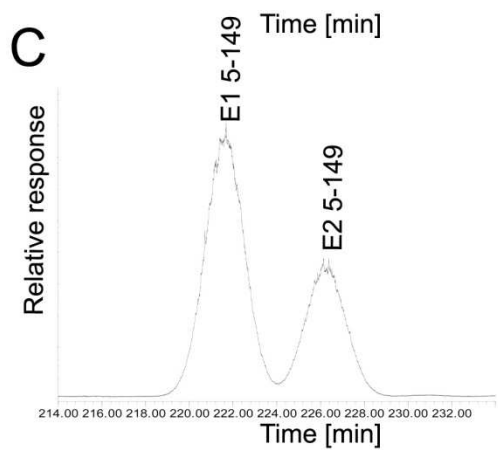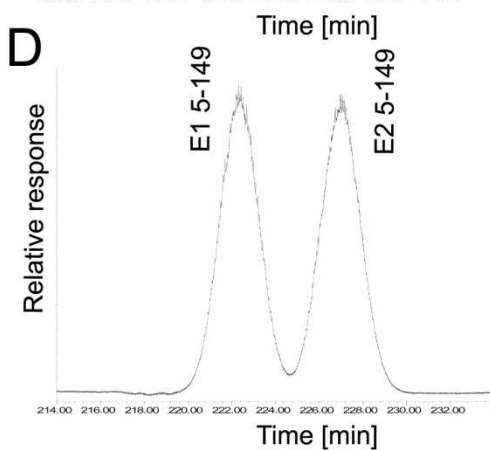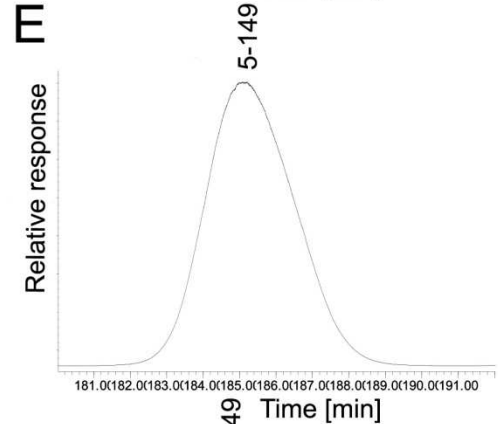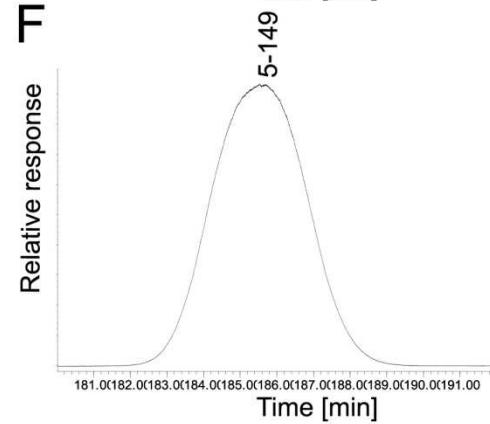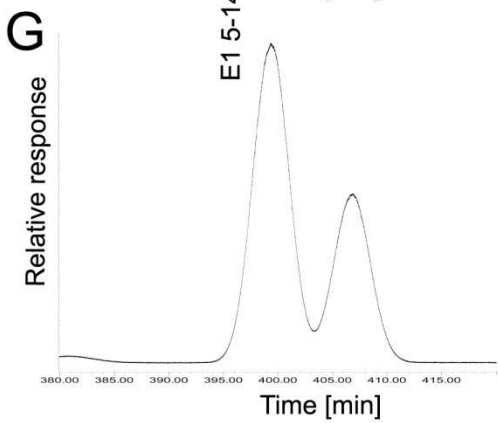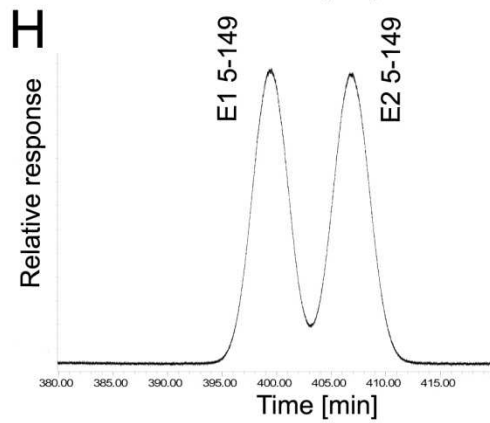



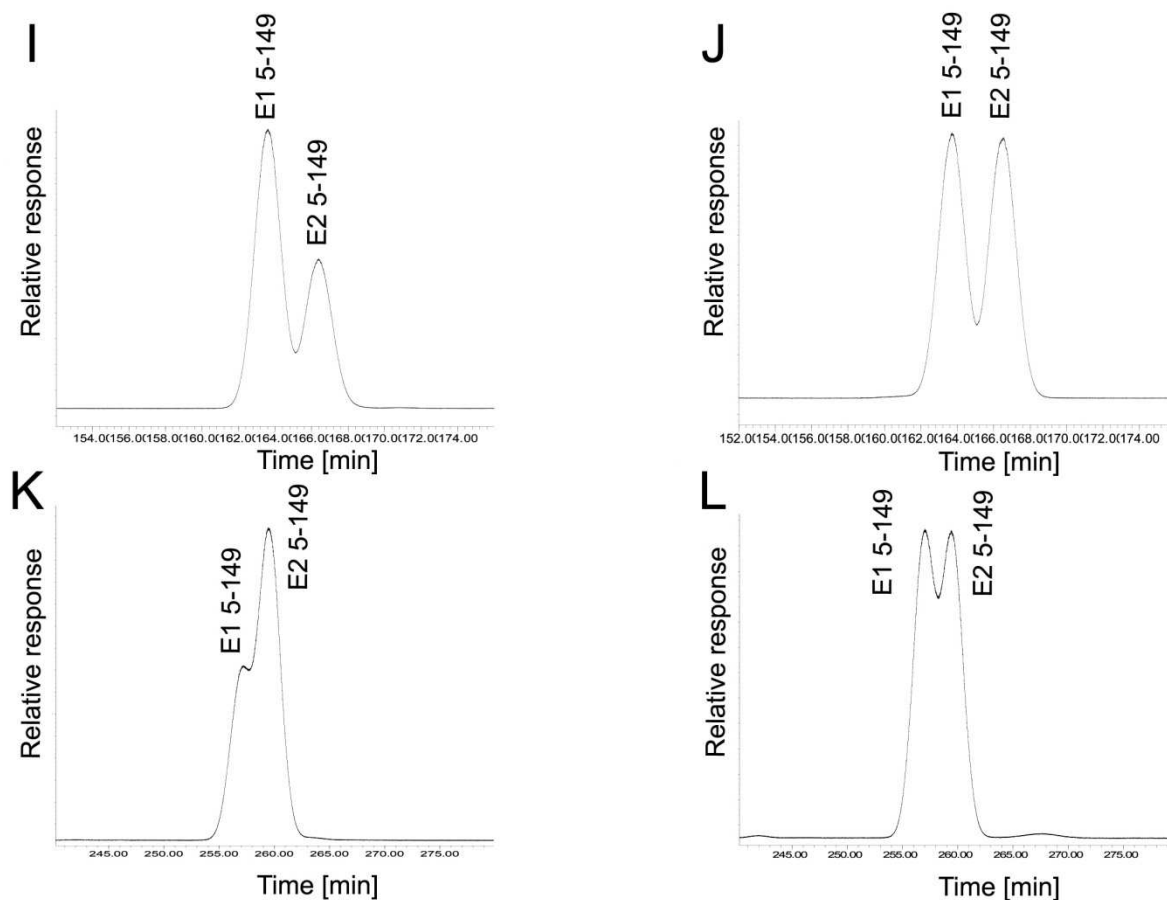

**Figure S11.** Enantiomeric enrichment of 5-149 isolated from an incubation of PCB 149 with liver microsomes. The diazomethane derivatized metabolite extract was analyzed on different enantioselective columns (left column) and compared to the corresponding metabolite standards (right column). **A.** incubation, BGB column, the atropisomers of 5'-132 are not resolved. **B.** racemic standard, BGB column, the atropisomers of 5'-132 are not resolved. **C.** incubation, BDM column, EF = 0.66. **D.** racemic standard, BDM column, EF = 0.50. **E.** incubation, BPM column, the atropisomers of 5'-132 are not resolved. **F.** racemic standard, BPM column, the atropisomers of 5'-132 are not resolved. **G.** incubation, CB column, EF = 0.65. **H.** racemic standard, CB column, EF = 0.50. **I.** incubation, CD column, EF = 0.65. **J.** racemic standard, CD column, EF = 0.50. **K.** incubation, GTA column, EF = 0.29. **L.** racemic standard, GTA column, EF = 0.50. Note the reverse of elution order of the atropisomers on the GTA column (K) compared to BDM (C), CB (G) and CD columns (I). Abbreviations of columns: BGB - BGB-172; BDM - Chiral-Dex B-DM, BPM - Chiral-Dex B-PM; CB -

Cyclosil-B; CD - Chirasil-Dex (CD); GTA - Chiral-Dex G-TA. See Table S3 for additional information.

## References

1. Thomas, P. E.; Reik, L. M.; Ryan, D. E.; Levin, W., Induction of two immunochemically related rat liver cytochrome P-450 isozymes, cytochromes P-450c and P-450d, by structurally diverse xenobiotics. *J. Biol. Chem.* 1983, 258, (7), 4590-4598.
2. Kania-Korwel, I.; Hrycay, E. G.; Bandiera, S.; Lehmler, H.-J., 2,2',3,3',6,6'-hexachlorobiphenyl (PCB 136) atropisomers interact enantioselectively with hepatic microsomal cytochrome P450 enzymes. *Chem. Res. Toxicol.* 2008, 21, (6), 1295-1303.
3. Lowry, O. H.; Rosenbrough, N. J.; Rarr, A. L.; Randall, R. J., Protein measurement with Folin Phenol reagent. *J. Biol. Chem.* 1951, 193, 265-275.
4. Renwick, A. B.; Lavignette, G.; Worboy, P. D.; Williams, B.; Surry, D.; Lewis, D. F.; Price, R. J.; Lake, B. G.; Evans, D. C., Evaluation of 7-benzyloxy-4-trifluoromethylcoumarin, some other 7-hydroxy-4-trifluoromethylcoumarin derivatives and 7-benzyloxyquinoline as fluorescent substrates for rat hepatic cytochrome P450 enzymes. *Xenobiotica* 2001, 31, (12), 861-78.
5. Burke, D. M. T., S.; Elcombe, C. R.; Halpert, J.; Haaparanta, T.; Mayer, R. T., Ethoxy-, pentoxy- and benzyloxyphenoxazones and homologues: A series of substrates to distinguish between different induced cytochromes P-450. *Biochem. Pharmacol.* 1985, 34, (18), 3337-3345.
6. McNaught, A. D.; Wilkinson, A., *IUPAC Compendium of Chemical Terminology*. 2nd Edition ed.; Blackwell Science Ltd: Oxford, UK, 1997.
